# Supplementary material for: China’s electric vehicle and climate ambitions jeopardized by surging critical material prices
Source: Springer Nature journal article supplement (doi:10.1038/s41467-023-36957-4), 2023-03-04
Supplement: MOESM1 [file 41467_2023_36957_MOESM1_ESM.pdf]

1 **Supplementary Information for**

2 **China's Electric Vehicle and Climate Ambitions Jeopardized by**  
3 **Surging Critical Material Prices**

4 Hetong Wang,<sup>1,10</sup> Kuishuang Feng,<sup>2,10</sup> Peng Wang,<sup>3,7,8,\*</sup> Yuyao Yang,<sup>4</sup>  
5 Laixiang Sun,<sup>2,9,\*</sup> Fan Yang,<sup>5</sup> Wei-Qiang Chen,<sup>3,8</sup> Yiyi Zhang,<sup>6</sup> Jiashuo Li<sup>1,\*</sup>

6

7 <sup>1</sup> Institute of Blue and Green Development, Shandong University, Weihai 264209,  
8 China

9 <sup>2</sup> Department of Geographical Sciences, University of Maryland, College Park, MD  
10 20742, USA

11 <sup>3</sup> Key Lab of Urban Environment and Health, Institute of Urban Environment,  
12 Chinese Academy of Sciences, Xiamen 361021, China

13 <sup>4</sup> Guanghua School of Management, Peking University, Beijing 100871, China

14 <sup>5</sup> Department of Planning, Aalborg University, 9000 Aalborg, Denmark

15 <sup>6</sup> Guangxi Key Laboratory of Intelligent Control and Maintenance of Power  
16 Equipment, Guangxi University, Nanning 530004, China

17 <sup>7</sup> Ganjiang Innovation Academy, Chinese Academy of Sciences, Ganzhou 341000,  
18 China;

19 <sup>8</sup> University of Chinese Academy of Sciences, Beijing 100864, China

20 <sup>9</sup> School of Finance & Management, SOAS University of London, London WC1H 0XG,  
21 UK

22 <sup>10</sup> These authors contributed equally

23

24 \*Correspondence: pwang@iue.ac.cn (P.W.), LSun123@umd.edu (L.S.),  
25 lijiashuo@sdu.edu.cn (J.L.)

26

27

28 Supplementary Notes S1-S6

29 Supplementary Tables S1-S8

30 Supplementary Figures S1-S45

31

32

## 33 **Supplementary Notes**

### 34 **Note S1. Calculation principles in GCAM**

35 The detailed description of Global Change Assessment Model (GCAM) approaches can be  
36 found in the website of Joint Global Change Research Institute (JGCRI,  
37 <https://gcims.pnnl.gov/modeling/gcam-global-change-analysis-model>). For a clear  
38 information, we have illustrated the transportation module in Fig. S2. The core functions for  
39 our quantification of transportation service are given as follows:

40

#### 41 **1.1 Demand for transportation service**

42 Demand for passenger transportation ( $D_P$ , in passenger-km) in region  $r$  and future time period  
43  $t$  is estimated with the following equation:

$$44 \quad D_P^{r,t} = \delta^r (Y_I^{r,t})^\alpha (P_I^{r,t})^\beta (N_I^{r,t}) \quad (1)$$

45 Where  $\delta$  is a base year calibration parameter;  $Y_I$  is the index for income in the form of per-  
46 capita GDP at time  $t$  divided by the per-capita GDP in the base year;  $P_I$  is the index of the price  
47 of transportation aggregated across all modes, size classes, and technologies and calculated as  
48 the ratio of price in time  $t$  to the price in the base year;  $N_I$  is the population in region  $r$ , in time  
49  $t$ . Finally,  $\alpha$  and  $\beta$  are income and price elasticities, respectively, with respect to per capita  
50 passenger demand, and are estimated by regressions based on historical demand data.

51 Demand for freight transportation ( $D_F$ , in tonne-km) in region  $r$  and future time period  $t$  is  
52 estimated with a very similar equation:

$$53 \quad D_F^{r,t} = \delta^r (GDP_I^{r,t})^{\alpha'} (P_I^{r,t})^{\beta'} \quad (2)$$

54 Different from the passenger transportation sector, the demand of the freight transportation  
55 sector is estimated on a per capita basis and then aggregated across the entire population.  
56 Therefore, income is expressed by the index of total GDP. The income and price elasticities of  
57 freight demand are designated by  $\alpha'$  and  $\beta'$  respectively.

58

#### 59 **1.2 Generalized cost of transportation service**

60 The total generalized cost of transportation services ( $P$ , in \$/PKT or \$/Tonne-KM) is derived  
61 as the weighted average cost of each available mode:

$$62 \quad P^{r,t} = \sum_i (S^i) (P^{i,r,t}) \quad (3)$$

63 where  $S^i$  is the share of mode  $i$  in terms of passenger-KM or Tonne-KM.

64 The costs by mode are calculated as the weighted average costs of all constituent size classes  
 65 plus the time value costs (value of travel time) associated with the mode, which is presented  
 66 as follows:

$$67 \quad P^{i,r,t} = P_{time}^{i,r,t} + \sum_i (S^s) (P^{s,i,r,t}) \quad (4)$$

68 where  $S^s$  is the share of size class ( $s$ ) under mode ( $i$ ) in terms of passenger-KM or Tonne-KM.

69 Time value costs are indicated as follows:

$$70 \quad P_{time}^{i,r,t} = \delta^i + \frac{W^{r,t}}{S_p^{i,r,t}} \quad (5)$$

71 Where  $W$  is the wage rate (\$/hour) calculated from the per capita GDP;  $S_p$  is the average door-  
 72 to-door speed of mode  $i$  (KM/hour), which varies by mode, region and time; and  $\delta$  is a unitless  
 73 parameter representing the cost associated with travel expressed as a multiplier of the wage  
 74 rate (value of time, or VOT).

75 The costs for each size class ( $s$ ), in turn, are calculated as the weighted average costs of all  
 76 constituent technologies ( $j$ ):

$$77 \quad P^{s,i,r,t} = \sum_j (S^j) (P^{j,s,i,r,t}) \quad (6)$$

78 Finally, technology costs may be broken down into fuel costs and non-fuel costs:

$$79 \quad P^{j,s,i,r,t} = \frac{(P_{fuel}^{r,t})(EI^{j,s,i,r,t}) + P_{NF}^{j,s,i,r,t}}{LF^{i,r,t}} \quad (7)$$

80 Where,  $P_{fuel}$  is the fuel price (\$/MJ), which is endogenous;  $EI$  is the vehicle energy or fuel  
 81 intensity (MJ/VKT);  $P_{NF}$  is the non-fuel price of transportation for the given mode; and  $LF$  is  
 82 the load factor defined either as passengers per vehicle or tonnes per vehicle.

83 The non-fuel costs are estimated for light-duty vehicles based on exogenous assumptions  
 84 about vehicle capital costs (purchase cost, infrastructure cost, and others), non-fuel operating  
 85 costs (maintenance cost, registration and insurance cost, and tolls), financing, and annual  
 86 vehicle utilization (vehicle-km per year). For freight technologies and passenger bus, the non-  
 87 fuel cost is estimated by deducting estimated fuel costs from total service costs (Capital  
 88 Expenditure-CAPEX and non-fuel Operational Expenditure-OPEX). In either case, the non-fuel  
 89 cost is converted to dollars per vehicle-km for the equation above. The model then computes  
 90 market shares of the different technologies as described in the logit choice below.

91

### 92 **1.3 Market shares of transportation types**

93 The market share of each transportation mode is determined by a calibrated logit formulation,  
 94 which is given by the following equation<sup>1,2</sup>:

$$S^{i,r,t} = \frac{(SW^{i,r})(P^{i,r,t})^{\lambda_i}}{\sum_i (SW^{i,r})(P^{i,r,t})^{\lambda_i}} \quad (8)$$

96 where  $S$  is the market share;  $SW$  is the share weight;  $P^i$  is the cost of transport service for a  
 97 mode  $i$ ; and  $\lambda$  is the logit exponent. The share weight is a calibration parameter, and the logit  
 98 exponent regulates the degree to which future price changes will be reflected in model shifts.  
 99  
 100

## 101 **Note S2. Critical material price forecast**

102 There is great uncertainty in the long-term prediction of material prices. Therefore, we use  
 103 three methods to do the forecasts. The historical price dynamics of these critical materials, as  
 104 the foundation for the price forecasting, are shown in Fig. S3.

105 In the High scenarios, we postulate that the initial surge of demand for EV will accelerate the  
 106 rising of the prices of critical materials, while the acceleration will dampen in the medium-run  
 107 and the price level will become flatten in the long-run, due to the increased recycling and the  
 108 increased use of substitutes. Thus, we apply a logistic function to predict the prices of critical  
 109 materials, in which the relationship between price and demand quantity is an S-shaped curve  
 110 lying between the lower and upper limit of the price (Eq. 9)<sup>3</sup>:

$$111 \frac{P-P_L}{P_U-P_L} = \frac{1}{1+\exp(-c_1-c_2D)} \quad (9)$$

112 where  $P_L$  is the lower limit of material price, which is derived from historical data;  $P_U$  is the  
 113 upper limit of material price, which we estimate to be multiple of the highest price observed  
 114 in the history;  $D$  is the quantity of annual material demand; and  $c_1$  and  $c_2$  are coefficients, which  
 115 are estimated by regressions based on historical demand data.

116 In the Medium scenarios, we use consumer price index (CPI) to deflate and then use regression  
 117 analysis to forecast the future dynamics of material prices<sup>4</sup>. It is common knowledge that the  
 118 purchasing power of a dollar in 1850 is significantly higher than that of a dollar today. The  
 119 extent of changes in the purchasing power of a dollar between a given year and the base year  
 120 is measured by price indices. The CPI is the most commonly used price index to quantify the  
 121 purchasing power of a dollar in a given year relative to the given base-year, which is based on  
 122 the values of a basket of items a representative consumer would buy (e.g., foods, housing,  
 123 transport entertainment etc.) in the given year and the base-year. Understanding how the  
 124 price of the metal in question increases or decreases in relation to the price of a standard  
 125 basket of goods will give better insight than looking at the nominal price in isolation. Therefore,  
 126 we will use the CPI, which is released by the United States Department of Labor<sup>5</sup>, to remove  
 127 the effect of inflation as presented in Eq. 10 below.

$$128 \quad \text{RealValue}_{\text{Year}_j} = \text{NominalValue}_{\text{Year}_q} \cdot \frac{\text{CPI}_{\text{Year}_j}}{\text{CPI}_{\text{Year}_q}} \quad (10)$$

129 In the Low scenarios, we predict the long-term changes in metal prices based on the regression  
 130 of logged prices on logged demand quantity (Single-Factor Learning Curve)<sup>5</sup>.

131  
 132

133 **Note S3. Impacts of critical material price surges on battery cost**

134 Since the critical materials are used in batteries, the change of battery cost should be clarified  
 135 first, and then the influence of critical material prices on EV cost can be discussed. We select  
 136 four major cathode materials, lithium (Li), cobalt (Co), nickel (Ni), and manganese (Mn), to  
 137 approximately represent the material cost of LIBs. The assumption that four major cathode  
 138 materials represent the whole cost of battery neglects the cost of "other" cathode active  
 139 materials, including aluminum in NCA cathodes and iron in LFP cathodes. The reason is that  
 140 each of them accounts for less than 2% of the cost of battery costs and their supply is much  
 141 less constrained in comparison with the four critical materials<sup>6-8</sup>.

142 The overall cost of a LIB and a PEM fuel cell was estimated by using economic modeling, which  
 143 reflects the battery cost fluctuation caused by material price surges (Eq. 11)<sup>9</sup>:

$$144 \quad C_j = [\sum_i (M_i \times P_i)] \times \left[\frac{1}{R_j}\right] \quad (11)$$

145 where for  $j = \text{fuel cell}$ ,  $i = \text{Pt}$ , for  $j = \text{LIBs}$ ,  $i = \text{Li, Co, Ni, Mn}$ ;  $C_j$  is the total battery cost of different  
 146 technologies;  $M_i$  is the material intensity;  $P_i$  is the material costs; and  $R_j$  is a ratio of the critical  
 147 material costs to the total battery cost.

148  
 149

150 **Note S4. The impact of critical material price changes on vehicle cost**

151 The final step is to calculate the share of the battery cost increment driven by increased  
 152 material price in the total cost of a vehicle. This share characterizes the material price surge  
 153 risk associated with low-carbon transport technologies.

$$154 \quad \text{Percentage of vehicle cost increase (\%)} = \frac{\text{The increase of battery costs (\$/veh)}}{\text{Vehicle cost under BLS scenario (\$/veh)}} \times 100\% \quad (12)$$

155 **Note S5. The vehicle stock and sale calculation**

156 Since the GCAM does not count the number of vehicles explicitly, a conversion of  
 157 transportation service demand into the number of vehicles is required. The vehicle stock can  
 158 be calculated using the following equation:

159 
$$Veh = D \times L^{-1} \times VKT^{-1} \quad (13)$$

160 where  $Veh$  stands for the vehicle stock;  $D$  is the transportation demand (passenger-km or  
 161 tonne-km);  $L$  is the load factor (persons or tonnes) per vehicle;  $VKT$  is the vehicle travelled  
 162 kilometer (km/vehicle).

163 We then adopt a stock-driven dynamic material-flow-analysis (MFA) model to estimate the  
 164 inflow (sale) and outflow (decommissioning) of vehicles<sup>10,11</sup>.

165 
$$\text{outflow}_{EV}(t_n) = \sum_{t_0}^{t_n-1} (\text{inflow}_{EV}(t_i) \cdot [\text{survival}(t_{i-1} - t_0) - \text{survival}(t_i - t_0)]) \quad (14)$$

166 Where the outflow in  $t_n$  ( $\text{outflow}_{EV}(t_n)$ ) is the sum of decommissioning of past inflow vintages  
 167 in  $t_i \in (t_0, t_{n-1})$ .  $\text{Survival}(\Delta t)$  is the complementary cumulative distribution function of the  
 168 normal distribution<sup>10</sup>. In this study, the average lifetime is assumed to be 10 years, 13 years,  
 169 and 15 years for LDV-4W, bus, and truck, respectively. According to the principle of  
 170 conservation of mass, the inflow ( $\text{inflow}_{EV}(t_n)$ ) must equal a combination of the changes in  
 171 stock ( $\text{stock}_{EV}(t_n) - \text{stock}_{EV}(t_{n-1})$ ) and all outflows during this period:

172 
$$\text{inflow}_{EV}(t_n) = \text{stock}_{EV}(t_n) - \text{stock}_{EV}(t_{n-1}) + \text{outflow}_{EV}(t_n) \quad (15)$$

173  
 174

175 **Note S6. The effects of second use and battery lifetime changes on material**  
 176 **recycling**

177 Closed-loop recycling of battery materials is an important source of future battery material  
 178 supply<sup>11</sup>, however, the changes in battery operation lifetime will have a significant impact on  
 179 material recycling. Therefore, we couple the lifetime distribution delay forecasting model with  
 180 the material flow analysis to analyze the recycling potential of battery materials by  
 181 considering both direct and indirect battery returns from first use and second use<sup>12</sup>. We  
 182 assume that the materials obtained by battery manufacturers through recycling are not  
 183 affected by material price fluctuations on the international market, that is, only the primary  
 184 demand for materials is affected by the surging material prices.

185 The lifecycle stages of an EV battery and the sources of waste batteries entering the recycling  
 186 market are illustrated in Fig. S4. EV waste batteries entering the recycling market include  
 187 direct and indirect sources. Indirect sources include decommissioned batteries after  
 188 secondary applications (such as energy storage systems) and batteries replaced by early  
 189 failures (replaced batteries can only be recycled). Batteries that do not belong to the early  
 190 failure and cannot be echelon utilized and can only be recycled belong to the direct source.  
 191 Here, early failure refers to a failure that occurs during the warranty period of an EV (8 years),

192 some of the battery faults ( $r(s)$ ) can be repaired, reused, or remanufactured again for use in  
 193 EVs, and other part of faulty batteries ( $1 - r(s)$ ) can only be replaced, and the replaced  
 194 batteries are recycled. The early failure remanufactured rate is assumed to be 70% in this  
 195 research<sup>14</sup>.

196 The amounts of replacements,  $QR(w)$  at year  $w$  for batteries sold in year  $s$  is calculated using  
 197 Eq. (16).

$$198 \quad QR(w) = \sum_{s=w-8}^{s=w-1} QP(s) \times D_{EV}(s, w) \times (1 - r(s)) \quad (16)$$

199 Where  $QP(s)$  is the total number of EVs put on the market in year  $s$  in the BLS scenario;  $D_{EV}(s,$   
 200  $w)$  is the probability of product failure in year  $w$  of a battery that started its use stage in year  
 201  $s$ ; The average lifetime of the use stage is set to be 11 years, and the standard deviation is set  
 202 as 1.8.

203 The direct waste batteries that fail outside the warranty period and directly flow onto the  
 204 recycling market in year  $w$  ( $DW(w)$ ) can be estimated with the following equation:

$$205 \quad DW(w) = \sum_{s=1}^{s=w-9} (QP(s) + QR(s)) \times D_{EV}(s, w) \times S(w) \quad (17)$$

206 Where  $S(w)$  is the share of recycling EV battery on EoL markets, which will be reduced from  
 207 90% in 2019 to 50% in 2030 and stay stable afterwards.

208 The amount of waste EV batteries flowing into the B2U application ( $Q_{B2U}$ ) can be calculated by  
 209 eq. (18):

$$210 \quad Q_{B2U} = \sum_{s=1}^{s=w-9} (QP(s) + QR(s)) \times D_{EV}(s, w) \times (1 - S(w)) \quad (18)$$

211 Where  $1-S(w)$  is the share of second use EV battery on EoL markets.

212 The composition of retired EV batteries from B2U applications  $IW_{B2U}(w)$ , is formulated in Eq.  
 213 (19).

$$214 \quad IW_{B2U}(w) = \sum_{s=1}^{s=w-1} Q_{B2U}(s) \times D_{B2U}(s, w) \quad (19)$$

215 Where  $D_{B2U}(s, w)$  is the probability of product failure in year  $w$  of a battery that started its use  
 216 stage in year  $s$ . The average lifetime of the lifetime of EV batteries in B2U is set to be 5 years,  
 217 and the standard deviation is set as 2.6.

218 Thus, the total waste stream returning to recycling in year  $w$  ( $TW(w)$ ), termed as the sum of  
 219 direct recycled batteries ( $DW$ ), waste batteries from second use applications ( $IW_{B2U}$ ), and  
 220 replacement EV batteries ( $QR$ ), is given by Eq. (20).

$$221 \quad TW(w) = DW(w) + IW_{B2U}(w) + QR(w) \quad (20)$$

222 The amount of recycling material in year  $w$  ( $FC_{recycling}(w)$ ) can be estimated with Eq. (21):

223  $FC_{recycling}(w) = TW(w) \times Cap_{EV}(s) \times C_i(s)$  (21)

224 Where  $Cap_{EV}(s)$  is their average capacity in kWh in year  $s$ , which is 35 kWh for LDV-4W, 70  
225 kWh for bus, and 106 kWh for truck;  $C_i(s)$  is material intensity of material  $i$  (kg/kWh) in EV  
226 batteries sold in year  $s$ , which is summarized in Table S2.

227



228 **Supplementary Tables**

229 **ST1 Technology economic assumptions**

230 **Table S1. Shared Socioeconomic Pathway 1 (SSP1) for socioeconomic assumptions.**

| Year | Population (thous) | GDP (Million1990US\$) |
|------|--------------------|-----------------------|
| 2020 | 1379410            | 9076750               |
| 2025 | 1379360            | 12699900              |
| 2030 | 1368370            | 16797900              |
| 2035 | 1348130            | 20926400              |
| 2040 | 1318370            | 24612200              |
| 2045 | 1280030            | 27701200              |
| 2050 | 1234330            | 29916900              |
| 2055 | 1182920            | 31226000              |
| 2060 | 1127190            | 31972400              |

231 **Table S2. Values used for each of the case study clean road transportation technology's**  
 232 **economic calculations.**

| Battery ( <i>j</i> )      | Material contribution to battery cost ( <i>R<sub>j</sub></i> ): <sup>13-15</sup> | Battery component                 | Element ( <i>i</i> ) | Price, \$/kg ( <i>P</i> ) | Average material intensity, kg/kWh ( <i>M</i> ) | Sources ( <i>P</i> and <i>M</i> ) |
|---------------------------|----------------------------------------------------------------------------------|-----------------------------------|----------------------|---------------------------|-------------------------------------------------|-----------------------------------|
| Li-ion battery (NMC111)   | 0.196                                                                            | NMC111 cathode active materials   | Li                   | 6.75                      | 0.118                                           | 8,16,17                           |
|                           |                                                                                  |                                   | Co                   | 34.19                     | 0.313                                           | 8,16,18                           |
|                           |                                                                                  |                                   | Mn                   | 2.04                      | 0.292                                           | 8,16,19                           |
|                           |                                                                                  |                                   | Ni                   | 13.91                     | 0.312                                           | 8,16,18                           |
| Li-ion battery (NMC622)   | 0.157                                                                            | NMC622 cathode active materials   | Li                   | 6.75                      | 0.100                                           | 8,16,17                           |
|                           |                                                                                  |                                   | Co                   | 34.19                     | 0.170                                           | 8,16,18                           |
|                           |                                                                                  |                                   | Mn                   | 2.04                      | 0.159                                           | 8,16,19                           |
|                           |                                                                                  |                                   | Ni                   | 13.91                     | 0.508                                           | 8,16,18                           |
| Li-ion battery (NMC811)   | 0.133                                                                            | NMC811 cathode active materials   | Li                   | 6.75                      | 0.090                                           | 8,16,17                           |
|                           |                                                                                  |                                   | Co                   | 34.19                     | 0.076                                           | 8,16,18                           |
|                           |                                                                                  |                                   | Mn                   | 2.04                      | 0.071                                           | 8,16,19                           |
|                           |                                                                                  |                                   | Ni                   | 13.91                     | 0.608                                           | 8,16,18                           |
| Li-ion battery (NMC9.5.5) | 0.122                                                                            | NMC9.5.5 cathode active materials | Li                   | 6.75                      | 0.090                                           | 8,16,17                           |
|                           |                                                                                  |                                   | Co                   | 34.19                     | 0.037                                           | 8,16,18                           |
|                           |                                                                                  |                                   | Mn                   | 2.04                      | 0.035                                           | 8,16,19                           |
|                           |                                                                                  |                                   | Ni                   | 13.91                     | 0.683                                           | 8,16,18                           |
| Li-ion battery (NCA)      | 0.194                                                                            | NCA cathode active materials      | Li                   | 6.75                      | 0.106                                           | 8,16,17                           |
|                           |                                                                                  |                                   | Co                   | 34.19                     | 0.117                                           | 8,16,18                           |
|                           |                                                                                  |                                   | Mn                   | 2.04                      | 0.000                                           | 8,16,19                           |
|                           |                                                                                  |                                   | Ni                   | 13.91                     | 0.618                                           | 8,16,18                           |
| Li-ion battery (LFP)      | 0.114                                                                            | LFP cathode active materials      | Li                   | 6.75                      | 0.087                                           | 8,16,17                           |
|                           |                                                                                  |                                   | Co                   | 34.19                     | 0.000                                           | 8,16,18                           |
|                           |                                                                                  |                                   | Mn                   | 2.04                      | 0.000                                           | 8,16,19                           |
|                           |                                                                                  |                                   | Ni                   | 13.91                     | 0.000                                           | 8,16,18                           |
| Li-ion battery (LMO)      | 0.103                                                                            | LMO cathode active materials      | Li                   | 6.75                      | 0.097                                           | 8,16,17                           |
|                           |                                                                                  |                                   | Co                   | 34.19                     | 0.000                                           | 8,16,18                           |
|                           |                                                                                  |                                   | Mn                   | 2.04                      | 0.103                                           | 8,16,19                           |
|                           |                                                                                  |                                   | Ni                   | 13.91                     | 0.000                                           | 8,16,18                           |
| Battery ( <i>j</i> )      | Battery cost, \$/ kW ( <i>C<sub>j</sub></i> )<br>Sources: <sup>20-23</sup>       | Battery component                 | Element ( <i>i</i> ) | Price, \$/kg ( <i>P</i> ) | Average material intensity, kg/kW ( <i>M</i> )  | Sources ( <i>P</i> and <i>M</i> ) |
| PEM fuel cell system      | 55                                                                               | Catalyst                          | Pt                   | 26715.6                   | 0.0002                                          | 18,24-26                          |

233 **ST2 Road transportation sector technology assumptions**

234 **Table S3. Road transport load factor (pers or tonnes/veh) in future scenarios from**  
 235 **2020–2060.**

| Vehicle size      | 2020 | 2025 | 2030 | 2035 | 2040 | 2045 | 2050 | 2055 | 2060 |
|-------------------|------|------|------|------|------|------|------|------|------|
| Compact Car       | 2.33 | 2.28 | 2.22 | 2.17 | 2.11 | 2.06 | 2    | 2    | 2    |
| Large Car and SUV | 2.50 | 2.50 | 2.50 | 2.50 | 2.50 | 2.50 | 2.50 | 2.50 | 2.50 |
| Mini Car          | 2.33 | 2.28 | 2.22 | 2.17 | 2.11 | 2.06 | 2    | 2    | 2    |
| Subcompact Car    | 2.33 | 2.28 | 2.22 | 2.17 | 2.11 | 2.06 | 2    | 2    | 2    |
| Light Bus         | 20   | 20   | 20   | 20   | 20   | 20   | 20   | 20   | 20   |
| Heavy Bus         | 40   | 40   | 40   | 40   | 40   | 40   | 40   | 40   | 40   |
| Light Truck       | 0.52 | 0.52 | 0.52 | 0.52 | 0.52 | 0.52 | 0.52 | 0.52 | 0.52 |
| Medium Truck      | 4.50 | 4.50 | 4.50 | 4.50 | 4.50 | 4.50 | 4.50 | 4.50 | 4.50 |
| Heavy Truck       | 7.45 | 7.45 | 7.45 | 7.45 | 7.45 | 7.45 | 7.45 | 7.45 | 7.45 |

236

237

238 **Table S4. Road transport vehicle traveled kilometer (VKT (km)) in future scenarios**  
 239 **from 2020–2060<sup>27,28</sup>.**

| Vehicle size      | 2020   | 2025   | 2030   | 2035   | 2040   | 2045   | 2050   | 2055   | 2060   |
|-------------------|--------|--------|--------|--------|--------|--------|--------|--------|--------|
| Compact Car       | 14796  | 14796  | 14796  | 14796  | 14796  | 14796  | 14796  | 14796  | 14796  |
| Large Car and SUV | 14924  | 14924  | 14924  | 14924  | 14924  | 14924  | 14924  | 14924  | 14924  |
| Mini Car          | 11466  | 11466  | 11466  | 11466  | 11466  | 11466  | 11466  | 11466  | 11466  |
| Subcompact Car    | 17340  | 17340  | 17340  | 17340  | 17340  | 17340  | 17340  | 17340  | 17340  |
| Light Bus         | 129800 | 131900 | 134000 | 136100 | 138200 | 140300 | 142400 | 142400 | 142400 |
| Heavy Bus         | 129800 | 131900 | 134000 | 136100 | 138200 | 140300 | 142400 | 142400 | 142400 |
| Light Truck       | 32750  | 34000  | 34750  | 35500  | 35500  | 35500  | 35500  | 35500  | 35500  |
| Medium Truck      | 81159  | 83727  | 85295  | 86863  | 86863  | 86863  | 86863  | 86863  | 86863  |
| Heavy Truck       | 86000  | 88700  | 90350  | 92000  | 92000  | 92000  | 92000  | 92000  | 92000  |

240

241

242 **Table S5. Road transport vehicle cost (1990\$/vehicle-km) in BLS scenario from 2020–**  
 243 **2060.**

| Mode              | Tech | 2020   | 2025   | 2030   | 2035   | 2040   | 2045   | 2050   | 2055   | 2060   |
|-------------------|------|--------|--------|--------|--------|--------|--------|--------|--------|--------|
| Compact Car       | ICEV | 0.2007 | 0.2049 | 0.2092 | 0.2135 | 0.2135 | 0.2135 | 0.2135 | 0.2135 | 0.2135 |
|                   | BEV  | 0.2333 | 0.2151 | 0.1969 | 0.1786 | 0.1777 | 0.1767 | 0.1757 | 0.1754 | 0.1751 |
|                   | FCEV | 0.2416 | 0.2227 | 0.2037 | 0.1847 | 0.1840 | 0.1834 | 0.1827 | 0.1827 | 0.1827 |
|                   | NGV  | 0.2291 | 0.2364 | 0.2437 | 0.2510 | 0.2511 | 0.2512 | 0.2513 | 0.2513 | 0.2513 |
|                   | HEV  | 0.2230 | 0.2303 | 0.2376 | 0.2450 | 0.2450 | 0.2450 | 0.2450 | 0.2450 | 0.2450 |
| Large Car and SUV | ICEV | 0.3478 | 0.3549 | 0.3621 | 0.3693 | 0.3693 | 0.3693 | 0.3692 | 0.3693 | 0.3693 |
|                   | BEV  | 0.3898 | 0.3596 | 0.3295 | 0.2993 | 0.2976 | 0.2959 | 0.2941 | 0.2937 | 0.2932 |
|                   | FCEV | 0.3775 | 0.3589 | 0.3403 | 0.3127 | 0.3081 | 0.3035 | 0.3079 | 0.3078 | 0.3077 |
|                   | NGV  | 0.3849 | 0.3971 | 0.4093 | 0.4215 | 0.4216 | 0.4218 | 0.4219 | 0.4219 | 0.4219 |
| Mini Car          | HEV  | 0.3712 | 0.3834 | 0.3956 | 0.4078 | 0.4078 | 0.4078 | 0.4078 | 0.4078 | 0.4078 |
|                   | ICEV | 0.0724 | 0.0754 | 0.0785 | 0.0815 | 0.0815 | 0.0815 | 0.0815 | 0.0815 | 0.0815 |
|                   | BEV  | 0.0963 | 0.0873 | 0.0783 | 0.0693 | 0.0689 | 0.0686 | 0.0682 | 0.0681 | 0.0680 |
|                   | FCEV | 0.1088 | 0.0990 | 0.0891 | 0.0793 | 0.0790 | 0.0788 | 0.0786 | 0.0786 | 0.0786 |
| Subcompact Car    | NGV  | 0.0769 | 0.0800 | 0.0830 | 0.0860 | 0.0860 | 0.0860 | 0.0860 | 0.0860 | 0.0860 |
|                   | HEV  | 0.0786 | 0.0817 | 0.0847 | 0.0877 | 0.0877 | 0.0877 | 0.0877 | 0.0877 | 0.0877 |
|                   | ICEV | 0.1099 | 0.1142 | 0.1185 | 0.1229 | 0.1229 | 0.1229 | 0.1229 | 0.1229 | 0.1229 |
|                   | BEV  | 0.1563 | 0.1399 | 0.1253 | 0.1072 | 0.1066 | 0.1060 | 0.1054 | 0.1052 | 0.1050 |
| Light Bus         | FCEV | 0.1570 | 0.1439 | 0.1308 | 0.1177 | 0.1173 | 0.1169 | 0.1165 | 0.1165 | 0.1165 |
|                   | NGV  | 0.1197 | 0.1240 | 0.1284 | 0.1327 | 0.1327 | 0.1327 | 0.1327 | 0.1327 | 0.1327 |
|                   | HEV  | 0.1223 | 0.1266 | 0.1309 | 0.1353 | 0.1353 | 0.1353 | 0.1353 | 0.1353 | 0.1353 |
|                   | ICEV | 0.7107 | 0.7107 | 0.7107 | 0.7107 | 0.7107 | 0.7107 | 0.7107 | 0.7107 | 0.7107 |
| Heavy Bus         | BEV  | 0.9700 | 0.8300 | 0.6000 | 0.5900 | 0.5800 | 0.5700 | 0.5700 | 0.5700 | 0.5700 |
|                   | FCEV | 1.1500 | 0.9900 | 0.7100 | 0.5900 | 0.5200 | 0.4900 | 0.4900 | 0.4800 | 0.4800 |
|                   | NGV  | 0.7669 | 0.7669 | 0.7669 | 0.7669 | 0.7669 | 0.7669 | 0.7669 | 0.7669 | 0.7669 |
| Light Truck       | ICEV | 0.8275 | 0.8275 | 0.8275 | 0.8275 | 0.8275 | 0.8275 | 0.8275 | 0.8275 | 0.8275 |
|                   | BEV  | 1.0800 | 0.9300 | 0.6700 | 0.6600 | 0.6500 | 0.6500 | 0.6300 | 0.6300 | 0.6300 |
|                   | FCEV | 1.2900 | 1.1100 | 0.8000 | 0.6600 | 0.5900 | 0.5500 | 0.4900 | 0.4800 | 0.4800 |
| Medium Truck      | NGV  | 0.8930 | 0.8930 | 0.8930 | 0.8930 | 0.8930 | 0.8930 | 0.8930 | 0.8930 | 0.8930 |
|                   | ICEV | 0.2973 | 0.2973 | 0.2973 | 0.2973 | 0.2973 | 0.2973 | 0.2973 | 0.2973 | 0.2973 |
|                   | BEV  | 0.5100 | 0.3600 | 0.3000 | 0.2500 | 0.2200 | 0.1900 | 0.1600 | 0.1600 | 0.1600 |
| Heavy Truck       | FCEV | 0.7100 | 0.4000 | 0.3200 | 0.2300 | 0.2000 | 0.1700 | 0.1400 | 0.1400 | 0.1400 |
|                   | NGV  | 0.3831 | 0.3805 | 0.3779 | 0.3754 | 0.3727 | 0.3701 | 0.3675 | 0.3675 | 0.3675 |
|                   | ICEV | 0.3314 | 0.3314 | 0.3314 | 0.3314 | 0.3314 | 0.3314 | 0.3314 | 0.3314 | 0.3314 |
| Heavy Truck       | BEV  | 0.5300 | 0.3700 | 0.3200 | 0.2600 | 0.2300 | 0.2000 | 0.1700 | 0.1700 | 0.1700 |
|                   | FCEV | 0.7400 | 0.4200 | 0.3300 | 0.2400 | 0.2100 | 0.1800 | 0.1500 | 0.1500 | 0.1500 |
|                   | NGV  | 0.4273 | 0.4244 | 0.4215 | 0.4185 | 0.4156 | 0.4127 | 0.4098 | 0.4098 | 0.4098 |
| Heavy Truck       | ICEV | 0.3466 | 0.3466 | 0.3466 | 0.3466 | 0.3466 | 0.3466 | 0.3466 | 0.3466 | 0.3466 |
|                   | BEV  | 0.6100 | 0.4300 | 0.3700 | 0.3000 | 0.2600 | 0.2300 | 0.1900 | 0.1900 | 0.1900 |
|                   | FCEV | 0.8500 | 0.4800 | 0.3800 | 0.2800 | 0.2400 | 0.2100 | 0.1700 | 0.1700 | 0.1700 |
|                   | NGV  | 0.4467 | 0.4437 | 0.4407 | 0.4376 | 0.4346 | 0.4316 | 0.4286 | 0.4286 | 0.4286 |

244  
 245 **Table S6. Comparison to results from literature for the NMC111 LIB chemistry.**  
 246 **Comparison shown for this study versus the Bloomberg New Energy Finance Group**  
 247 **report<sup>29</sup>.**

| 100% Price Increase in Material Price | Change in NMC111 Battery Cost (BNEF <sup>29</sup> ) | Change in NMC111 Battery Cost (This Study) |
|---------------------------------------|-----------------------------------------------------|--------------------------------------------|
| Lithium                               | 8%                                                  | 5%                                         |
| Cobalt                                | 20%                                                 | 12%                                        |
| Nickel                                | 3%                                                  | 2%                                         |

248

249 **Table S7. Comparison to results from literature for the EV development under material**  
 250 **shortage constraint. Comparison shown for this study versus Liu et al.<sup>30</sup>**

| Scenario   |        | EV stock in 2050 (million) | EV market share in 2050 (%) |
|------------|--------|----------------------------|-----------------------------|
| Liu et al. | NMC    | 685.8                      | 89.0                        |
|            | LS     | 226.1                      | 46.8                        |
|            | HS     | 301.2                      | 62.3                        |
| This study | BLS    | 489.8                      | 70.7                        |
|            | High   | 217.2                      | 33.5                        |
|            | Medium | 394.7                      | 60.9                        |
|            | Low    | 463.5                      | 68.8                        |

251 *Note:* This study includes scenarios in which EVs are equipped with different types of LIBs, and results in this  
 252 table in which EVs are equipped with NCM111 LIBs. *Abbreviations:* NMC, Non-metal-constraints; LS, Low  
 253 metal supply; HS, High metal supply; BLS, Absence of surge in material prices; High, High level of surge in  
 254 material prices; Medium, Medium surge in material prices; Low, Low surge in material prices.

255

Table S8. Literature review on vehicle flow and stock projection.

| Author                                 | Method                                                                                                                                                                                                                                                                                                                                                                                                                                                                                                                                                                                                                                                                                                                                                                                                                                                                                                                                                                                                                                                                                                                                                                                                                                                                                                                                                                        | Key results                                                                                                                                                                                                                                                                                                                                                                                                                                                                                                                                  |
|----------------------------------------|-------------------------------------------------------------------------------------------------------------------------------------------------------------------------------------------------------------------------------------------------------------------------------------------------------------------------------------------------------------------------------------------------------------------------------------------------------------------------------------------------------------------------------------------------------------------------------------------------------------------------------------------------------------------------------------------------------------------------------------------------------------------------------------------------------------------------------------------------------------------------------------------------------------------------------------------------------------------------------------------------------------------------------------------------------------------------------------------------------------------------------------------------------------------------------------------------------------------------------------------------------------------------------------------------------------------------------------------------------------------------------|----------------------------------------------------------------------------------------------------------------------------------------------------------------------------------------------------------------------------------------------------------------------------------------------------------------------------------------------------------------------------------------------------------------------------------------------------------------------------------------------------------------------------------------------|
| Milovanoff et al. (2020) <sup>31</sup> | <p>GCAM:<br/>The demand for passenger transportation services depends on per-capita GDP, the aggregated service price across all modes, the population, and income and price elasticities. Then, the market shares by mode and technology are determined using a logit formulation based on the cost of transport service and other cost parameters.</p>                                                                                                                                                                                                                                                                                                                                                                                                                                                                                                                                                                                                                                                                                                                                                                                                                                                                                                                                                                                                                      | <p>Current US policies are insufficient to remain within a sectoral CO<sub>2</sub> emission budget for light-duty vehicles, consistent with preventing more than 2 °C global warming, creating a mitigation gap of up to 19 GtCO<sub>2</sub> (28% of the projected 2015–2050 light-duty vehicle fleet emissions). Closing the mitigation gap solely with EVs would require more than 350 million on-road EVs (90% of the fleet), half of national electricity demand and excessive amounts of critical materials to be deployed in 2050.</p> |
| McCollum et al. (2018) <sup>32</sup>   | <p>Six global energy economy modelling frameworks were employed in this study: GEM-E3T-ICCS, IMACLIM-R, IMAGE, MESSAGE-Transport, TIAM-UCL and WITCH.</p> <p>(1) GEM-E3T-ICCS: The stock of vehicles by transport sector and the cars, represented as durable goods in the modelling of behavior of households, change over time as a result of mobility and scrappage. The choice of between vehicle technologies depends on relative costs, which include purchasing cost, running costs and cost factors reflecting uncertainty factors.</p> <p>(2) IMACLIM-R: The service demand is determined by demography and labor productivity growth, the maximum potentials of technologies, the learning rates decreasing the cost of technologies, fossil fuel reserves, the parameters of the functions representing energy-efficiency in end-uses, and the parameters of the functions representing energy-demand behaviors and life-styles.</p> <p>(3) IMAGE: The service demand is determined by GDP and population projections.</p> <p>(4) MESSAGE-Transport: Future demand for passenger travel in the various modes is projected on a passenger-kilometer (pkm) basis as a function of per-capita GDP.</p> <p>(5) TIAM-UCL: The service demands projected are calculated from a set of exogenously defined drivers (e.g., GDP, population, number of households); the</p> | <p>A diverse set of measures targeting vehicle buyers is necessary to drive widespread adoption of clean technologies. Carbon pricing alone is insufficient to bring low-carbon vehicles to the mass market, though it may have a supporting role in ensuring a decarbonized energy supply.</p>                                                                                                                                                                                                                                              |

|                                   |                                                                                                                                                                                                                                                                                                                                                                                                                         |                                                                                                                                                                                                                                                                                                        |
|-----------------------------------|-------------------------------------------------------------------------------------------------------------------------------------------------------------------------------------------------------------------------------------------------------------------------------------------------------------------------------------------------------------------------------------------------------------------------|--------------------------------------------------------------------------------------------------------------------------------------------------------------------------------------------------------------------------------------------------------------------------------------------------------|
|                                   | demands respond to prices.<br>(6) WITCH: Transport demand is explicitly calculated based on GDP and population projections.                                                                                                                                                                                                                                                                                             |                                                                                                                                                                                                                                                                                                        |
| Isik et al. (2021) <sup>33</sup>  | COMET model:<br>Transport demands are derived by gross domestic product, population, etc.                                                                                                                                                                                                                                                                                                                               | The electrification of light-duty vehicles at earlier periods is essential for deeper reductions in air emissions. When further combined with energy efficiency improvements, these actions contribute to CO <sub>2</sub> reductions under the scenarios of more CO <sub>2</sub> -intense electricity. |
| Baars et al. (2021) <sup>34</sup> | Ricardo Sultan model:<br>Projections for future car sales are based on the average car ownership per 1000 inhabitants in 2017, multiplied by future population projections.                                                                                                                                                                                                                                             | The rapid development of EVs will lead to widespread adoption of LIBs, which will require increased natural resources for the automotive industry. The expected rapid increase in batteries could result in new resource challenges and supply-chain risks.                                            |
| Hao et al. (2019) <sup>11</sup>   | Transport Impact Model (TIM):<br>(1) Private passenger vehicle growth model: Automotive growth is correlated with household income growth and vehicle price variation.<br>(2) Urban public transportation vehicle growth model: Automotive growth is correlated with urbanization and population growth.<br>(3) Economic utility vehicle growth model: Automotive growth is correlated with GDP growth.                 | A mass electrification of the heavy-duty segment on top of the light-duty segment would substantially increase the lithium demand and impose further strain on the global lithium supply.                                                                                                              |
| Peng et al. (2018) <sup>35</sup>  | China Provincial Road Transport Energy Demand and GHG Emissions Analysis (CPREG) model:<br>(1) Non-taxi passenger vehicle stocks are projected with the Gompertz function relating vehicle ownership to per-capita GDP.<br>(2) The stock of commercial buses is the product of the ownership and population.<br>(3) Freight vehicles stock is assumed to be correlated to the elasticity between vehicle stock and GDP. | China's vehicle stock will keep increasing to 543 million by 2050. The spatial distributions of future vehicle stock, energy demand and GHG emissions vary among provinces and show a generally downward trend from east to west.                                                                      |
| Pan et al. (2018) <sup>36</sup>   | GCAM-TU:<br>(1) Passenger demand is determined by income (per capita GDP), population, and aggregate service price.<br>(2) Freight demand trajectory is estimated based on population and GDP that is subject to price-induced demand response.                                                                                                                                                                         | China's transportation sector might need significant changes beyond 2030 to decouple associated CO <sub>2</sub> emissions from GDP growths. Supporting national mitigation has more pronounced implications on freight than passenger transport services, and arouses a radical shift of               |

|                                    |                                                                                                                                                                 |                                                                                                                                                                                                                                              |
|------------------------------------|-----------------------------------------------------------------------------------------------------------------------------------------------------------------|----------------------------------------------------------------------------------------------------------------------------------------------------------------------------------------------------------------------------------------------|
|                                    |                                                                                                                                                                 | transport fuels away from fossil-based liquids to clean alternatives.                                                                                                                                                                        |
| Khanna et al. (2021) <sup>37</sup> | Demand Resource Energy Analysis Model (DREAM):<br>The future sales and the implied stock of heavy-duty trucks is estimated by a bottom-up stock turnover model. | Beginning to deploy battery electric and fuel-cell heavy-duty trucks (HDTs) as early as 2020 and 2035, respectively, could achieve significant and the largest CO <sub>2</sub> emissions reduction by 2050 with a decarbonized power sector. |

258

259

# Supplementary Figures

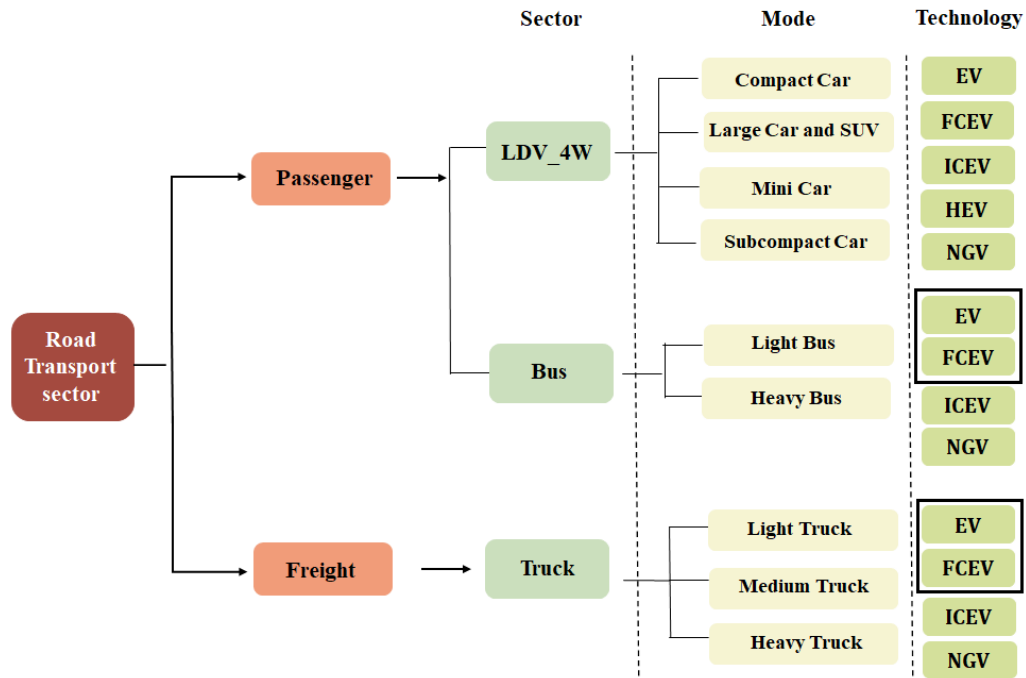

261

262

263

264

265

266

267

**Figure S1. The structure of China's road transport sector.** The technologies in the black box are those which GCAM v5.2 does not contain but we have added. *Abbreviations:* LDV-4W, light duty vehicle-4 wheels; EV, electric vehicle (electric vehicle refers to battery electric vehicle in this paper); FCEV, fuel cell vehicle; ICEV, internal combustion engine vehicle; HEV, hybrid electric vehicle; NGV, natural gas vehicle.

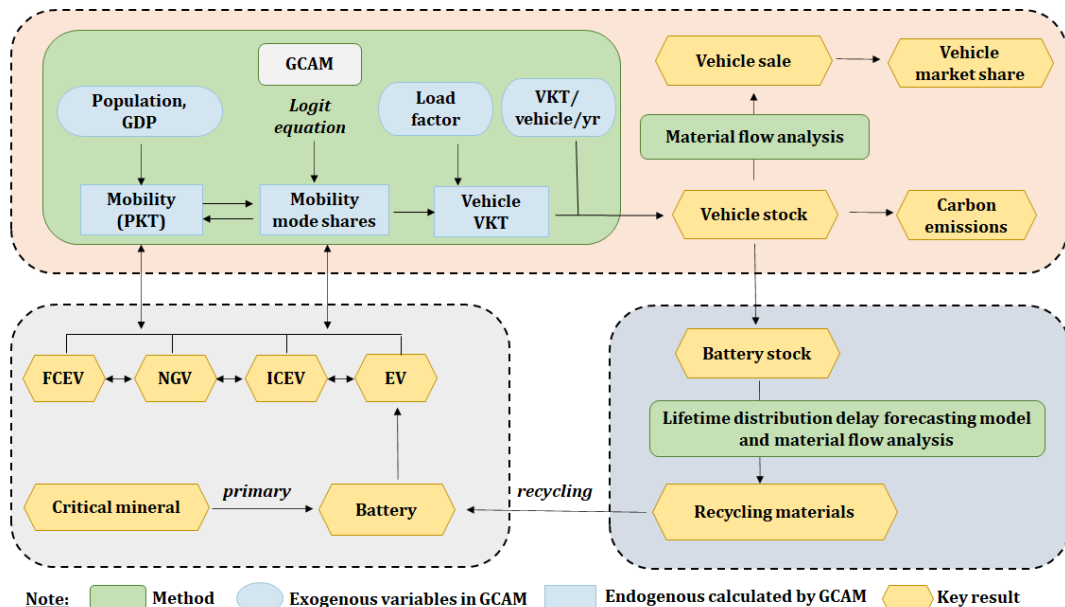

268

269

270

271

272

**Figure S2. Schematic diagram of the analysis framework.** VKT is vehicle kilometers travelled, PKT passenger kilometers travelled (PKT is related to VKT through the number of passengers per vehicle, which is sometimes called the occupancy rate); The abbreviations of EV, FCEV, ICEV, HEV, and NGV are the same as in Fig. S1.



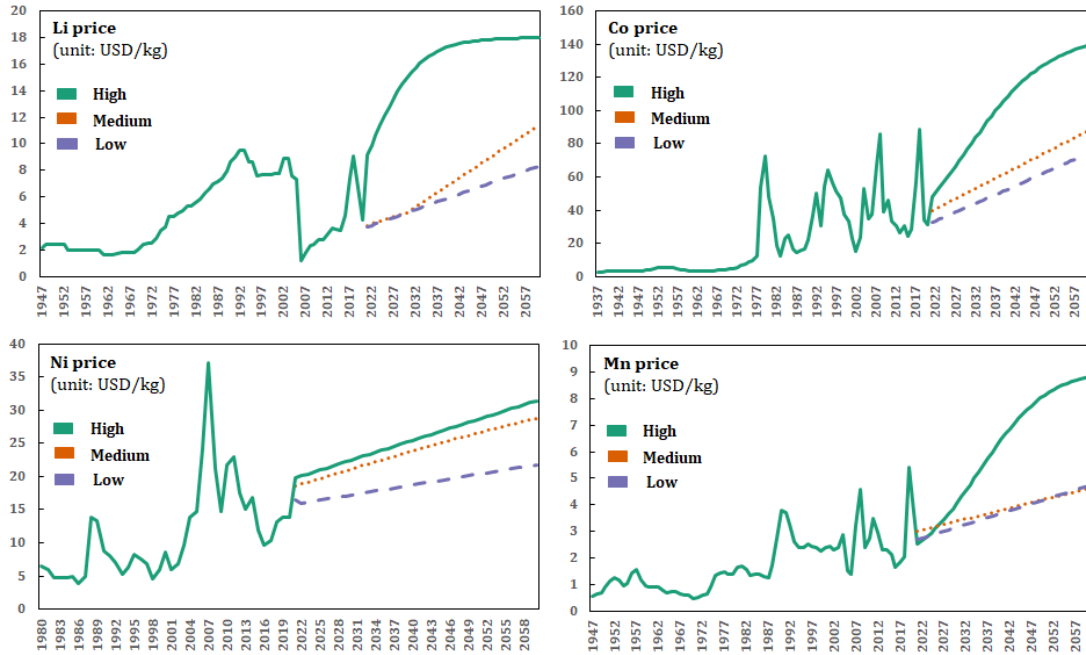

273

274 **Figure S3. Historical and forecasted prices of critical materials.** High scenario in which a rapid  
 275 increase in critical material price affects EV costs; Medium scenario in which a steady increase in  
 276 critical material price affects EV costs; Low scenario in which a slight increase in critical material  
 277 price mainly affects EV costs during the middle and later periods of the forecast.  
 278

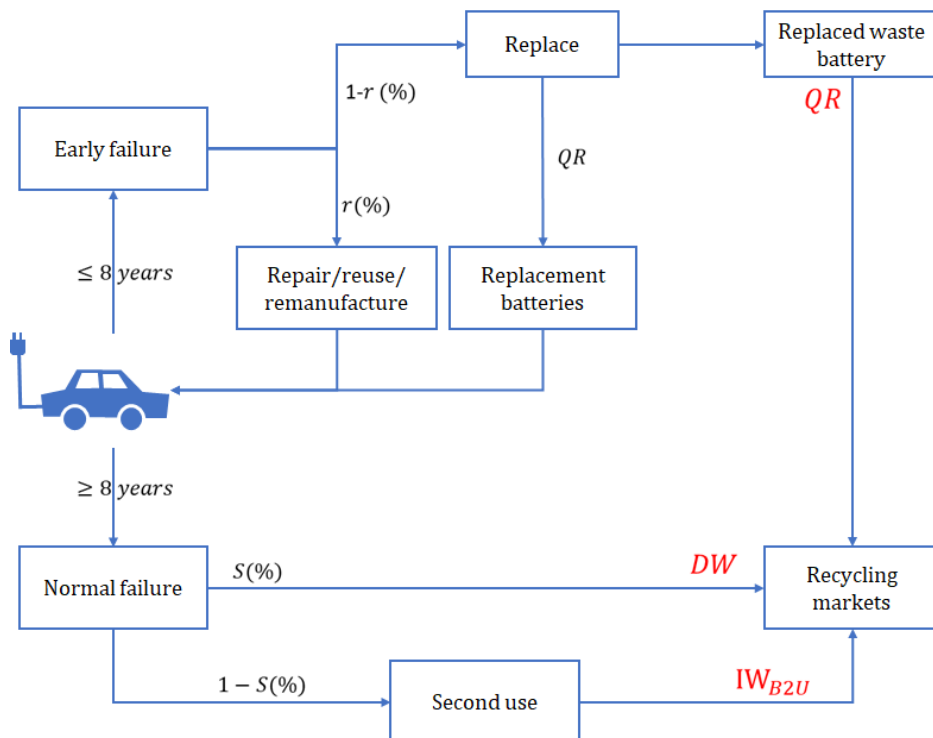

279

280 **Figure S4. Sources of waste batteries entering the recycling market.**  $r$  is the share of early  
 281 failures of batteries during the warranty period that can be remanufactured;  $S$  is the share of  
 282 recycling on EoL markets;  $QR$  is the amount of replacement EV batteries;  $DW$  is the amount of direct  
 283 waste EV batteries;  $IW_{B2U}$  is the amount of waste EV batteries after second use applications.

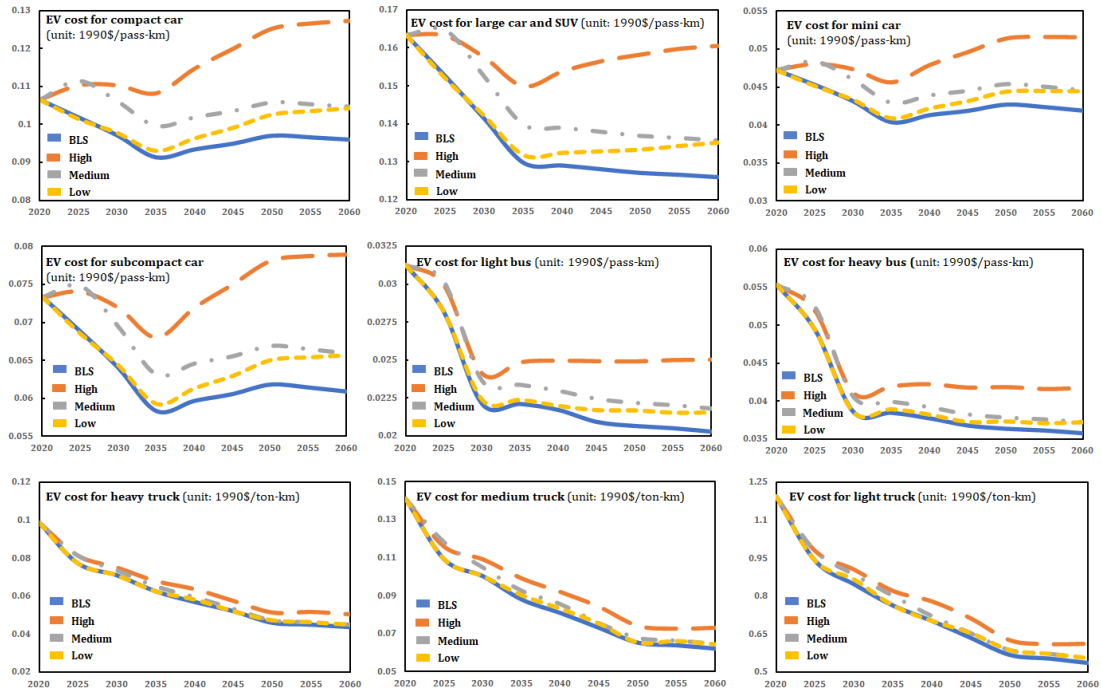

284  
285  
286  
287  
288  
289  
290

**Figure S5.** Cost evolution of EV equipped with NCM111 LIBs from 2020 to 2060. BLS refers to the base-line scenario in which the uptake pace of EVs will fulfil the requirement of the carbon neutrality target and the EV cost will fall rapidly in line with its historical and forecasted development trend in China as reported in the existing literature; The scenarios of High, Medium, and Low are the same as in Fig. S3; The abbreviation of EV is the same as in Fig. S1.

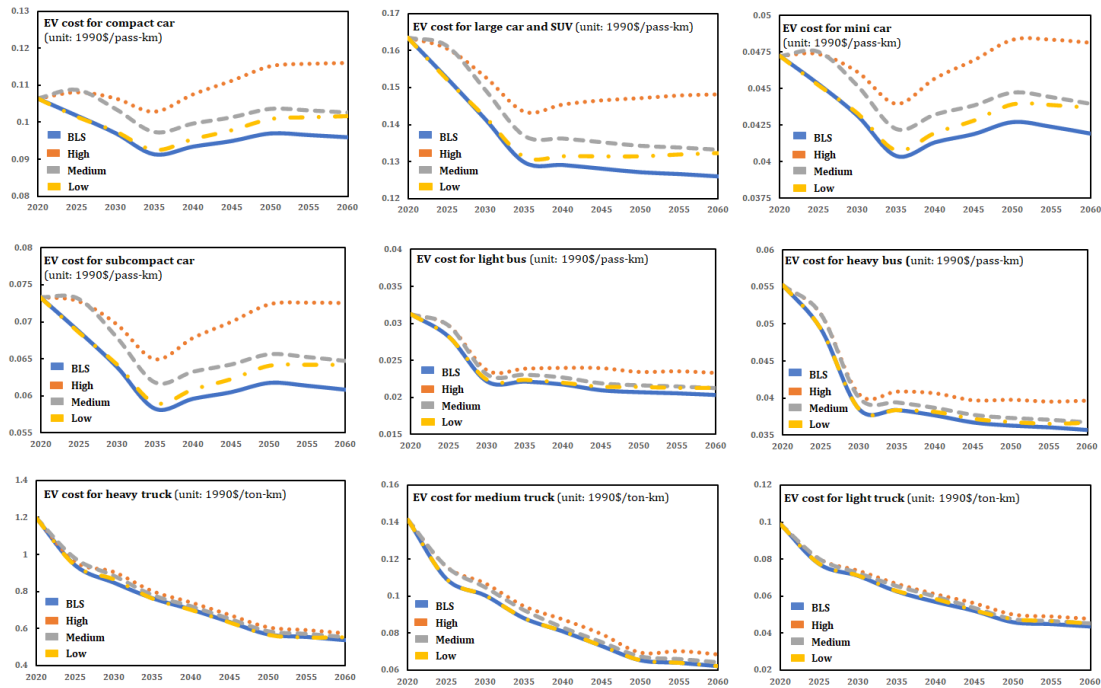

291  
292  
293  
294  
295

**Figure S6.** Cost evolution of EV equipped with NCM622 LIBs from 2020 to 2060. *Note:* The scenario of BLS is the same as in Fig. S5; The scenarios of High, Medium, and Low are the same as in Fig. S3; The abbreviation of EV is the same as in Fig. S1.

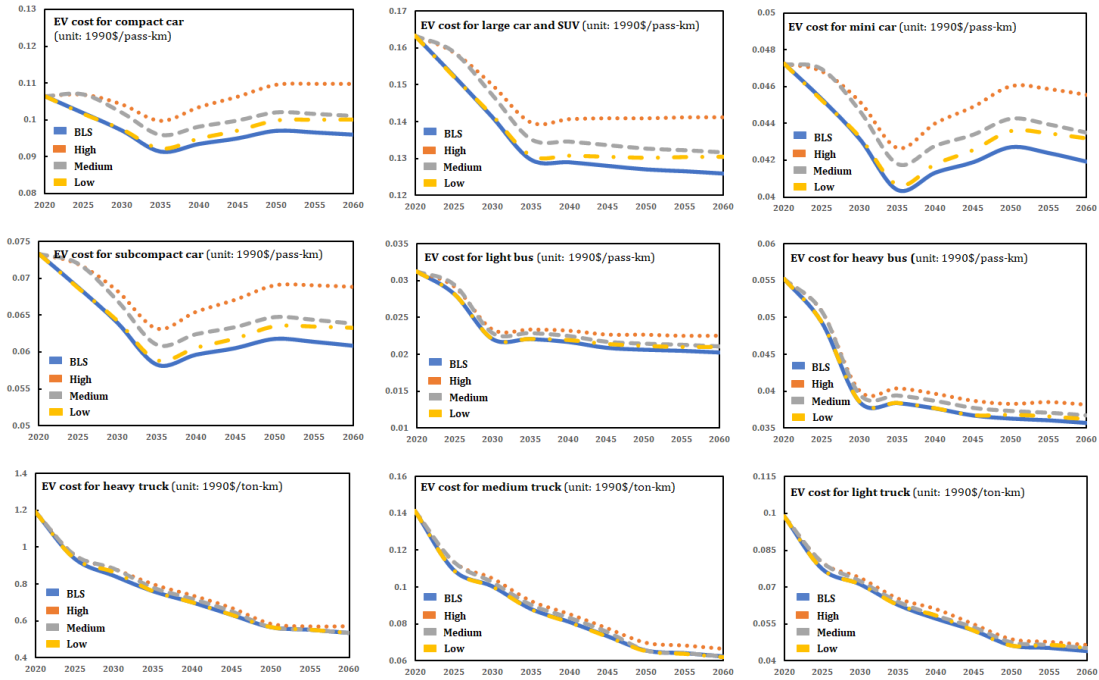

296  
297  
298  
299  
300

**Figure S7. Cost evolution of EV equipped with NCM811 LIBs from 2020 to 2060.** The scenario of BLS is the same as in Fig. S5; The scenarios of High, Medium, and Low are the same as in Fig. S3; The abbreviation of EV is the same as in Fig. S1.

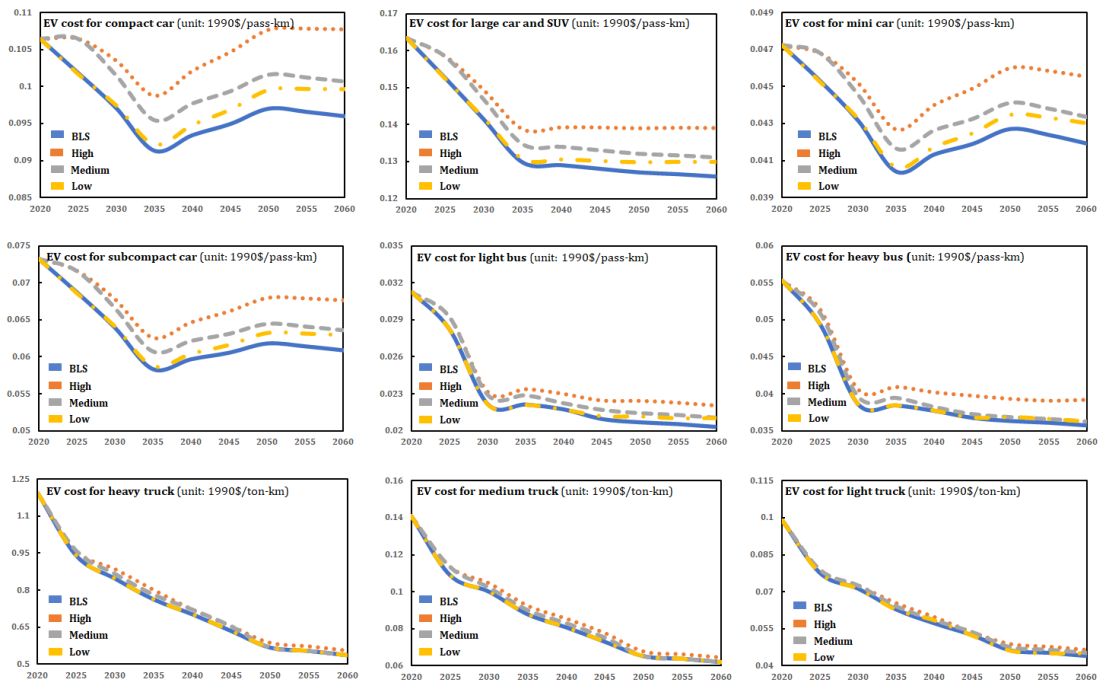

301  
302  
303  
304  
305  
306

**Figure S8. Cost evolution of EV equipped with NCM9.5.5 LIBs from 2020 to 2060.** The scenario of BLS is the same as in Fig. S5; The scenarios of High, Medium, and Low are the same as in Fig. S3; The abbreviation of EV is the same as in Fig. S1.

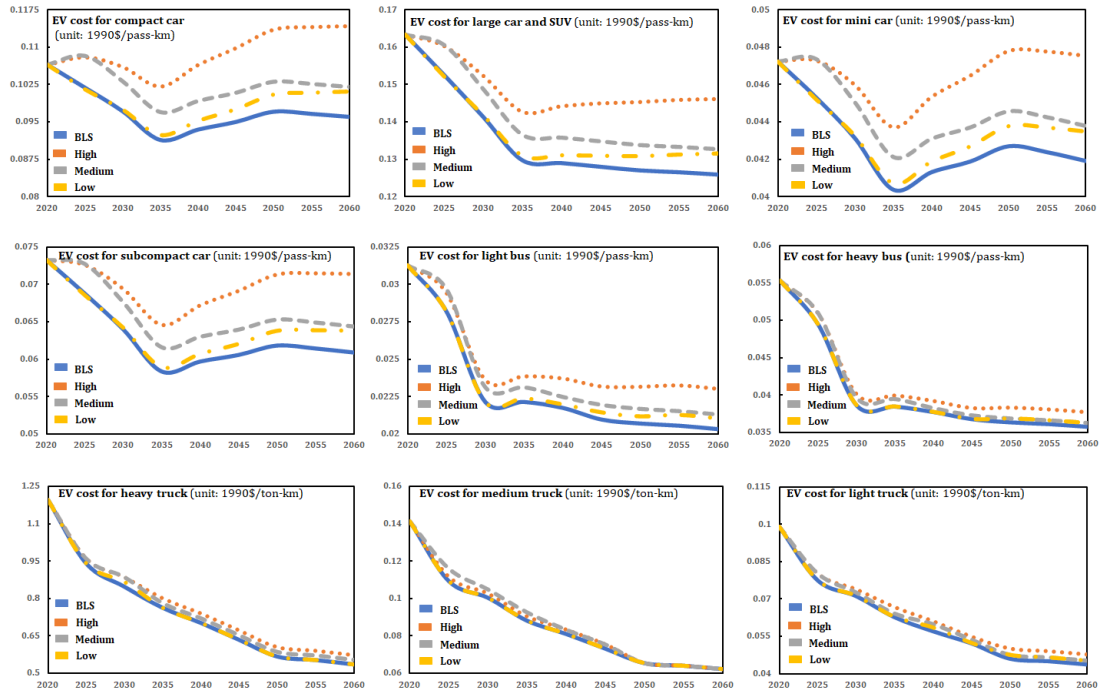

307  
 308 **Figure S9. Cost evolution of EV equipped with NCA LIBs from 2020 to 2060.** The scenario of  
 309 BLS is the same as in Fig. S5; The scenarios of High, Medium, and Low are the same as in Fig. S3;  
 310 The abbreviation of EV is the same as in Fig. S1.  
 311

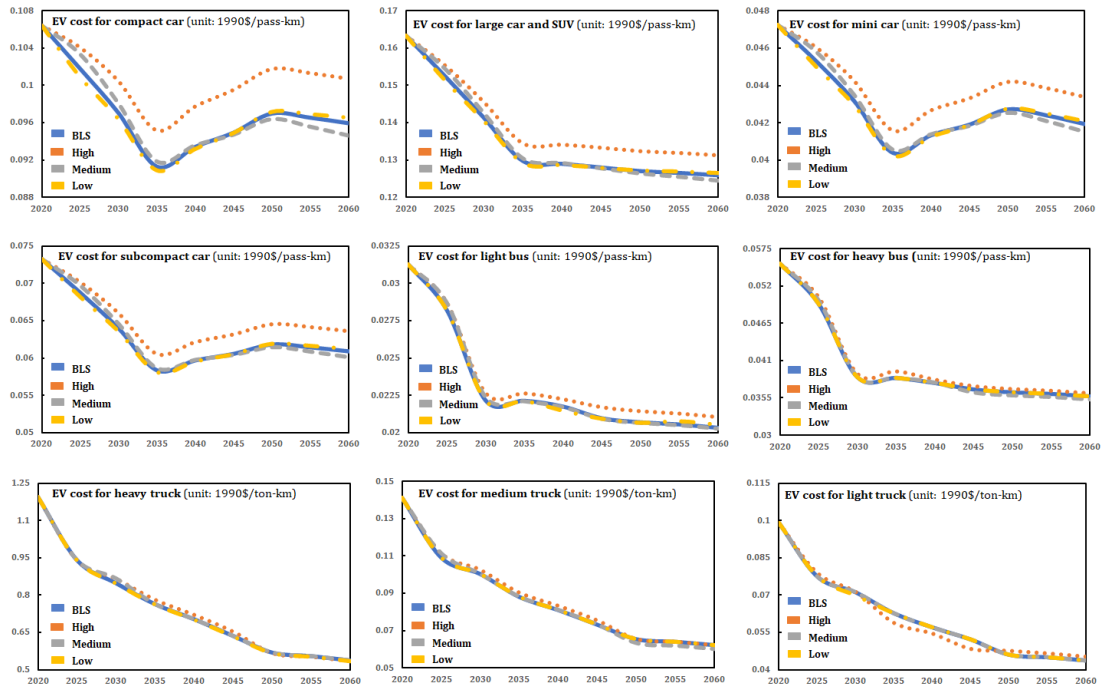

312  
 313 **Figure S10. Cost evolution of EV equipped with LFP LIBs from 2020 to 2060.** The scenario of  
 314 BLS is the same as in Fig. S5; The scenarios of High, Medium, and Low are the same as in Fig. S3;  
 315 The abbreviation of EV is the same as in Fig. S1.  
 316  
 317

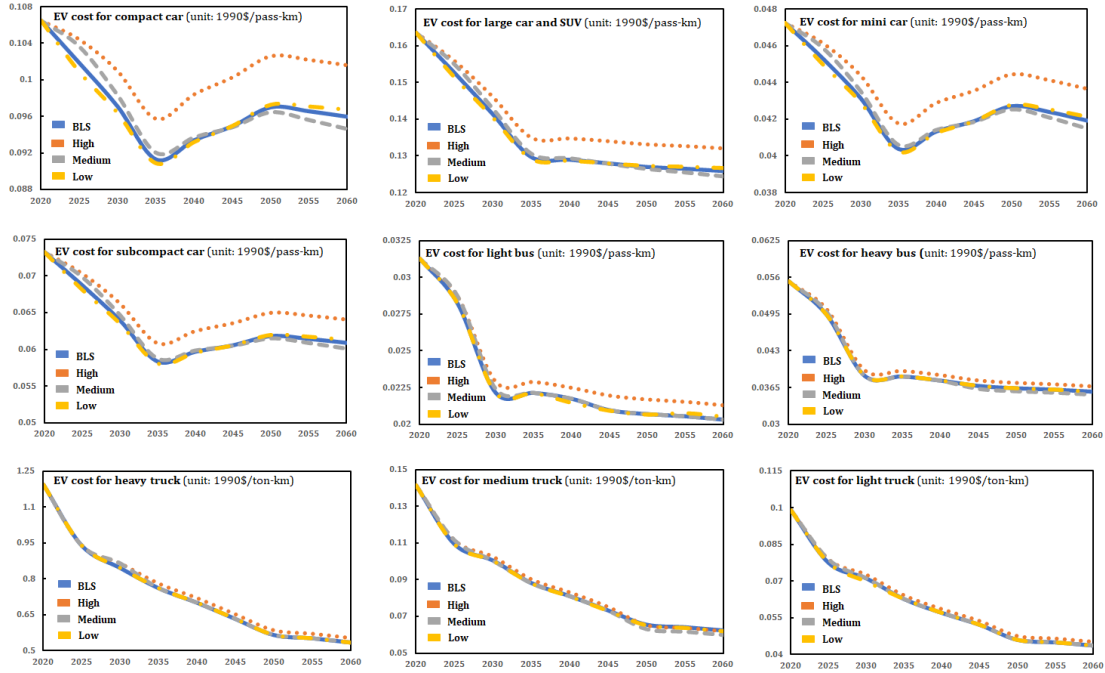

318

319 **Figure S11. Cost evolution of EV equipped with LMO LIBs from 2020 to 2060.** The scenario of  
 320 BLS is the same as in Fig. S5; The scenarios of High, Medium, and Low are the same as in Fig. S3;  
 321 The abbreviation of EV is the same as in Fig. S1.  
 322

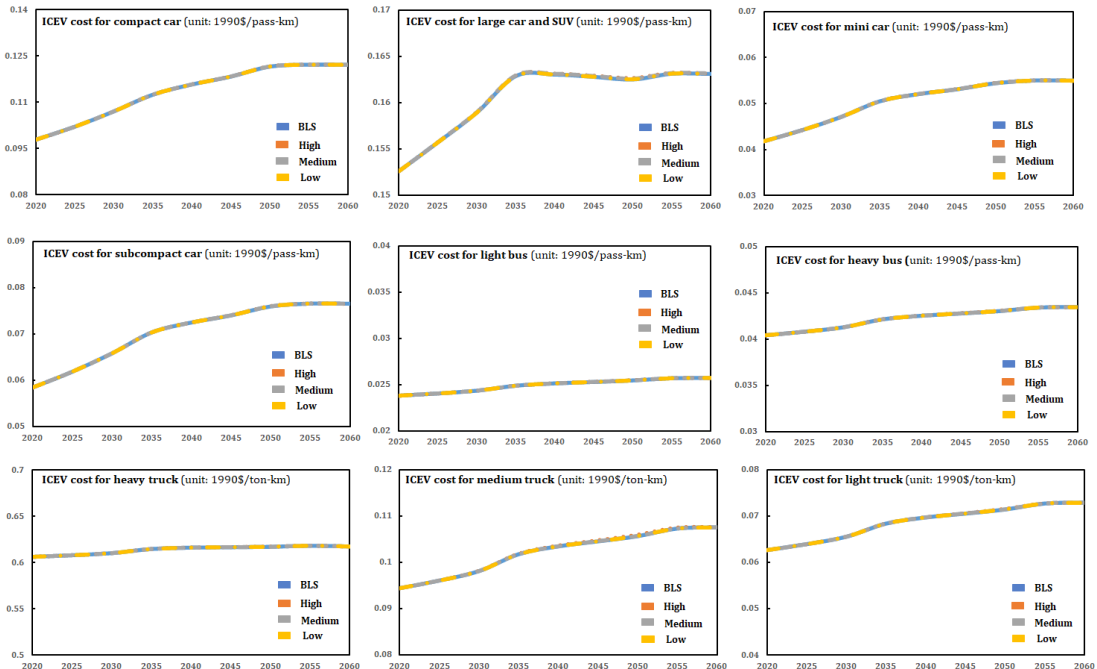

323

324 **Figure S12. Cost evolution of ICEV from 2020 to 2060.** The scenario of BLS is the same as in Fig. S5; The  
 325 scenarios of High, Medium, and Low are the same as in Fig. S3; The abbreviation of ICEV is the same as in Fig.  
 326 S1.  
 327  
 328

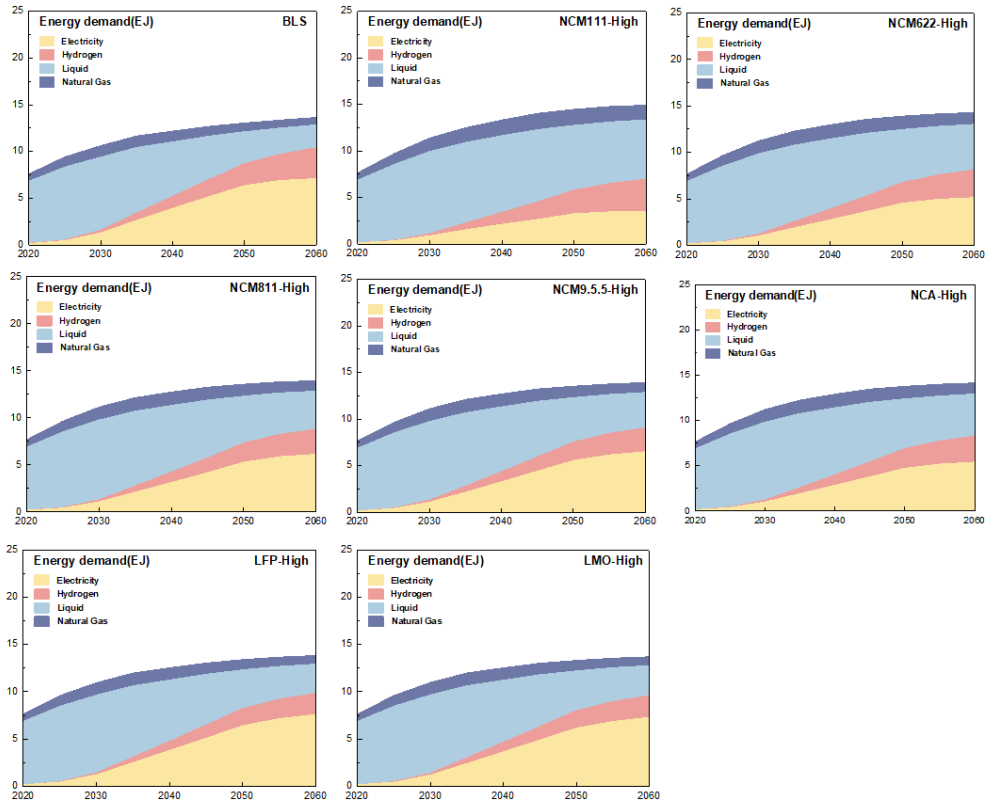

329  
330  
331

**Figure S13. Energy demand by fuel in the High scenario from 2020 to 2060.** The scenario of BLS is the same as in Fig. S5; The scenario of High is the same as in Fig. S3.

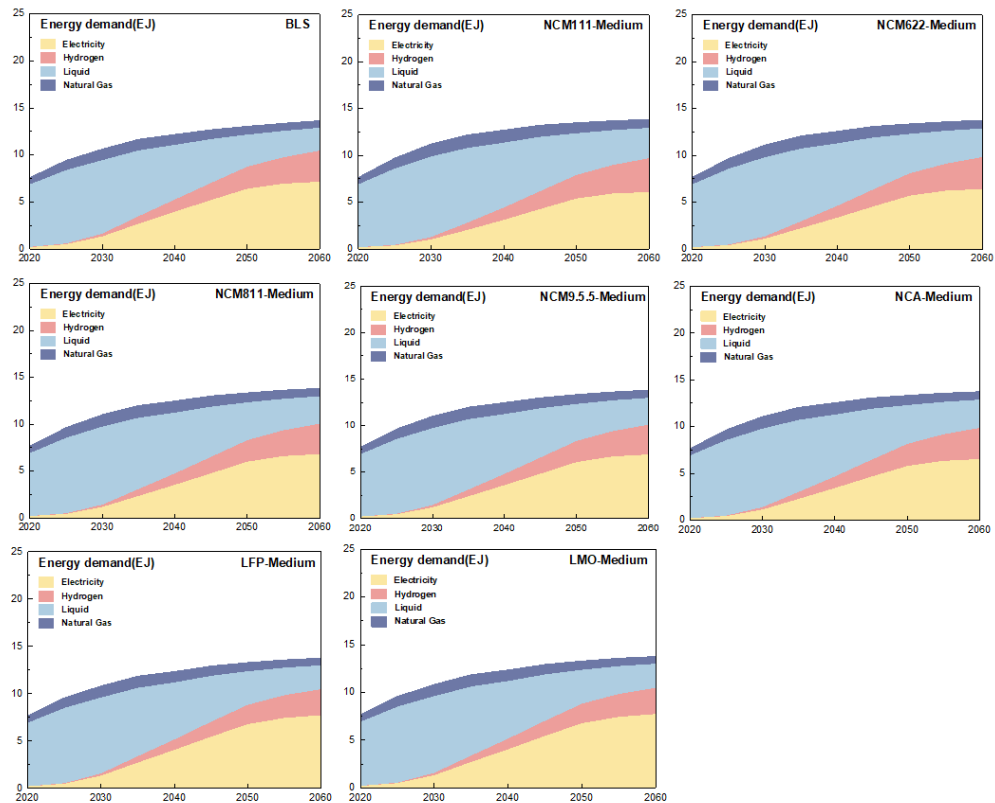

332  
333  
334

**Figure S14. Energy demand by fuel in the Medium scenario from 2020 to 2060.** The scenario of BLS is the same as in Fig. S5; The scenario of Medium is the same as in Fig. S3.

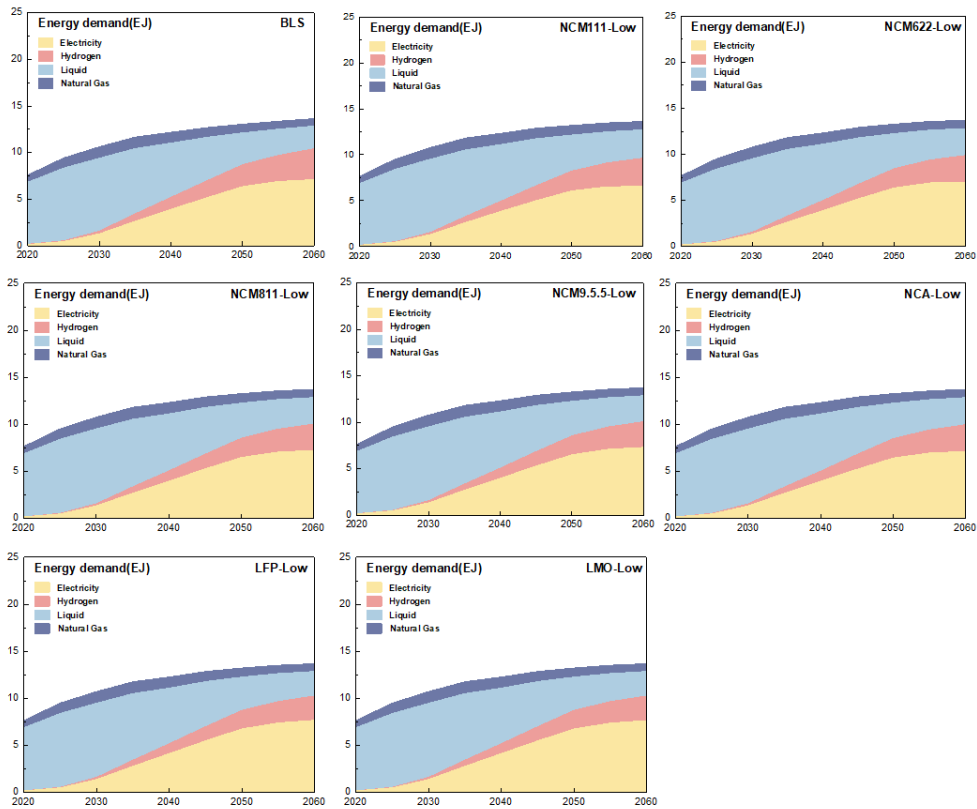

335  
336  
337

**Figure S15. Energy demand by fuel in the Low scenario from 2020 to 2060.** The scenario of BLS is the same as in Fig. S5; The scenario of Low is the same as in Fig. S3.

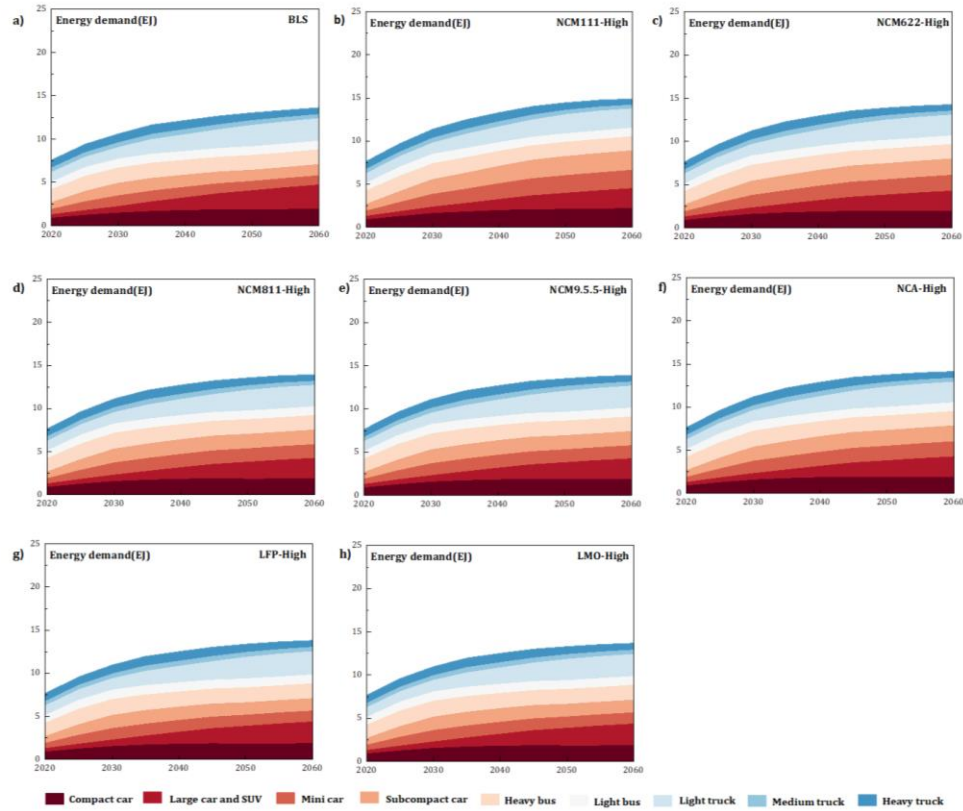

338  
339  
340

**Figure S16. Energy demand by sector in the High scenarios from 2020 to 2060.** The scenario of BLS is the same as in Fig. S5; The scenario of High is the same as in Fig. S3.

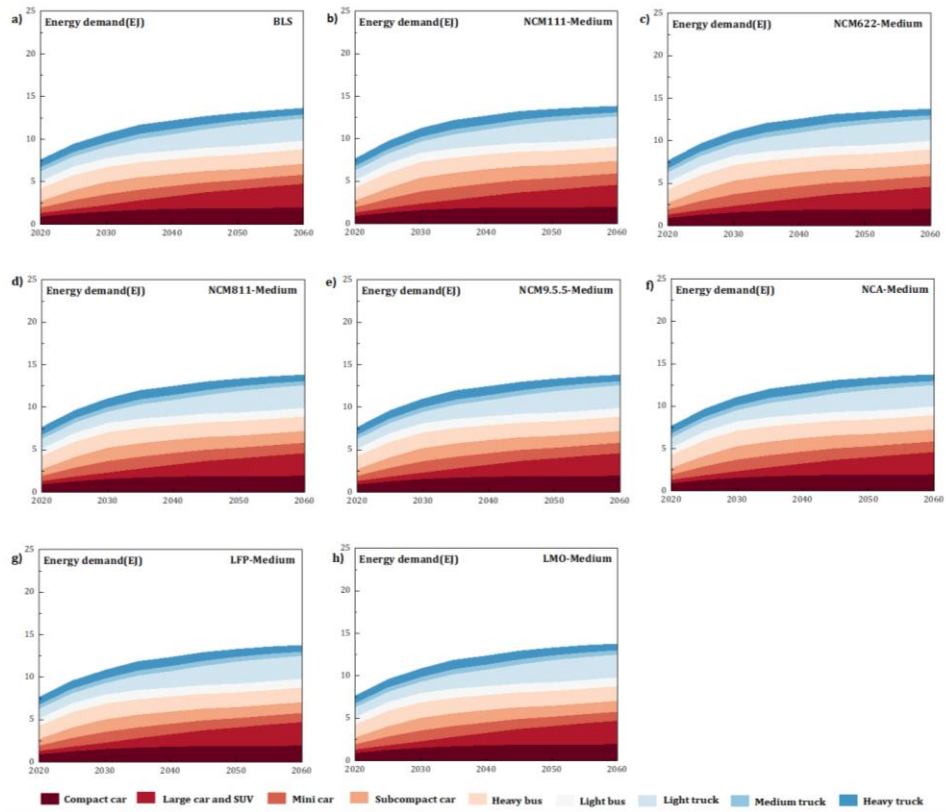

341

342

343

**Figure S17. Energy demand by sector in the Medium scenarios from 2020 to 2060.** The scenario of BLS is the same as in Fig. S5; The scenario of Medium is the same as in Fig. S3.

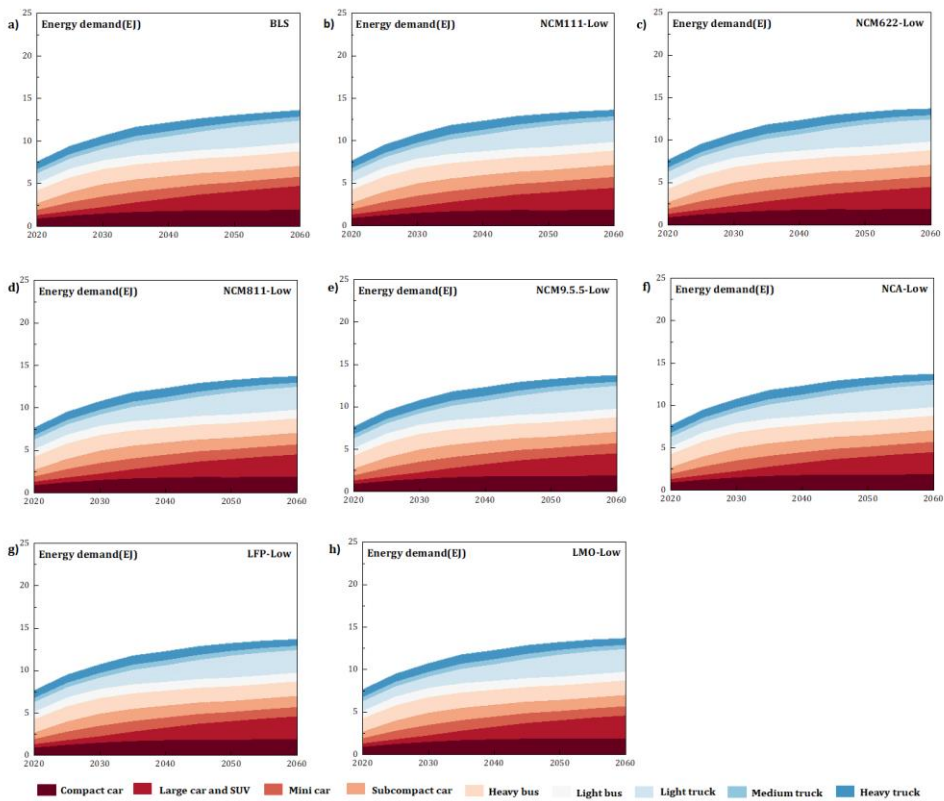

344

345

346

**Figure S18. Energy demand by sector in the Low scenarios from 2020 to 2060.** The scenario of BLS is the same as in Fig. S5; The scenario of Low is the same as in Fig. S3.



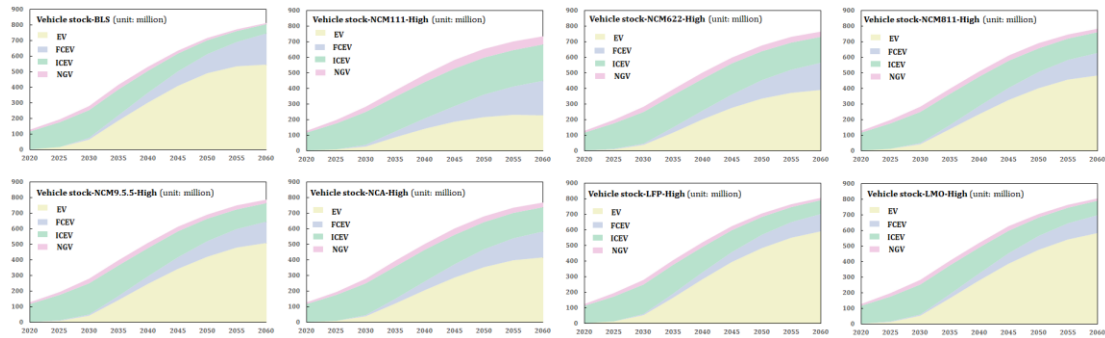

347

348 **Figure S19. Vehicle stock in the High scenarios from 2020 to 2060.** The abbreviations of EV,  
 349 FCEV, ICEV, HEV, and NGV are the same as in Fig. S1; The scenario of BLS is the same as in Fig. S5;  
 350 The scenario of High, is the same as in Fig. S3.

351

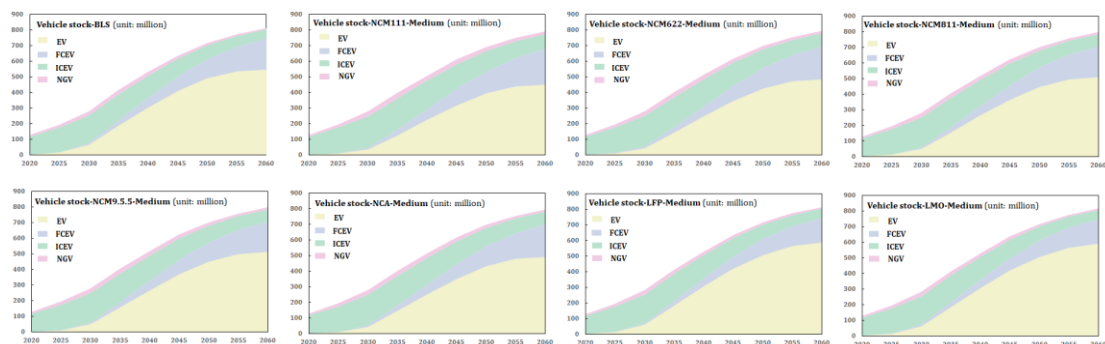

352

353 **Figure S20. Vehicle stock in the Medium scenarios from 2020 to 2060.** The abbreviations of  
 354 EV, FCEV, ICEV, HEV, and NGV are the same as in Fig. S1; The scenario of BLS is the same as in Fig.  
 355 S5; The scenario of Medium is the same as in Fig. S3.

356

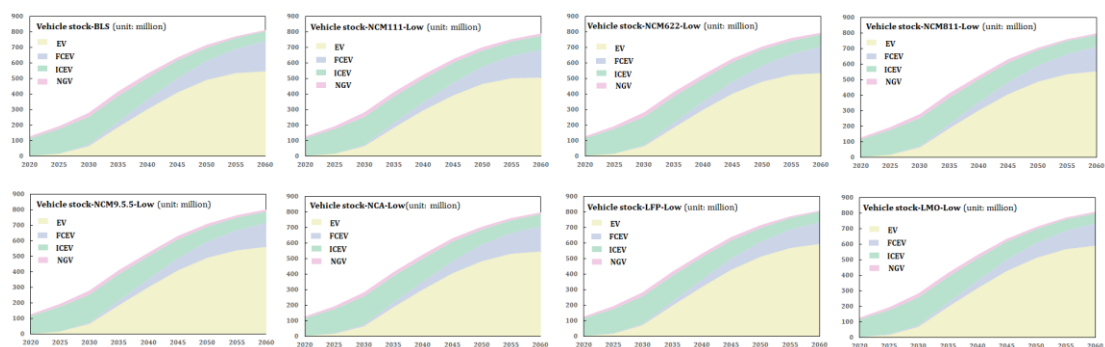

357

358 **Figure S21. Vehicle stock in the Low scenarios from 2020 to 2060.** The abbreviations of EV,  
 359 FCEV, ICEV, HEV, and NGV are the same as in Fig. S1; The scenario of BLS is the same as in Fig. S5;  
 360 The scenario of Low is the same as in Fig. S3.

361

362

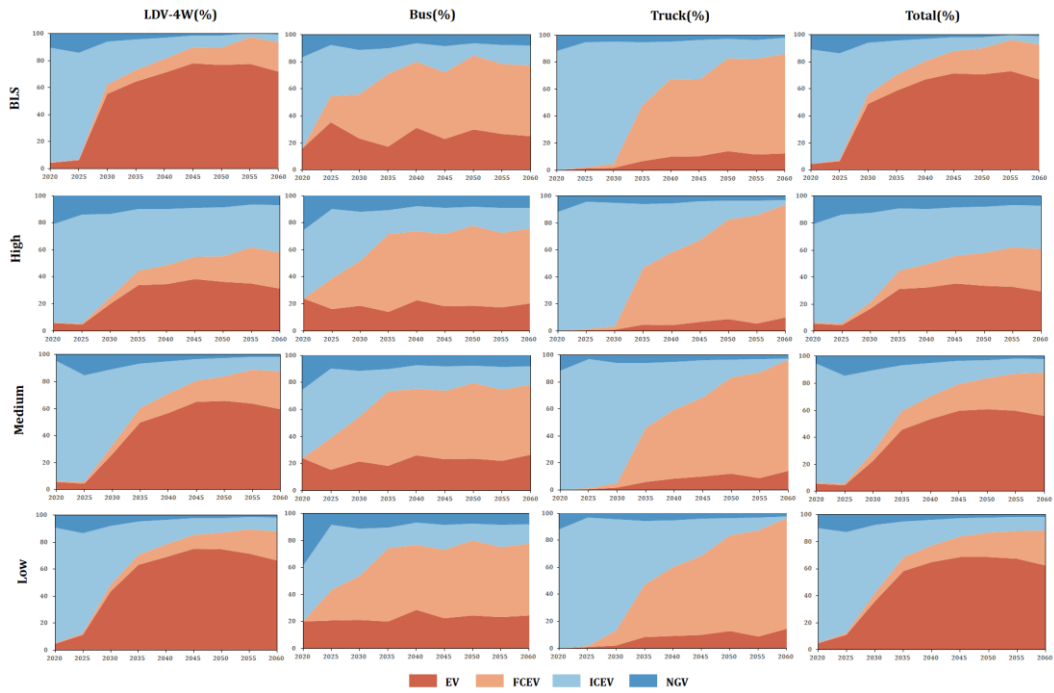

363  
 364  
 365  
 366  
 367  
 368

**Figure S22. Vehicle penetration rate from 2020 to 2060 in which EVs are equipped with NCM111 LIBs.** The abbreviations of EV, FCEV, ICEV, HEV, NGV, and LDV-4W are the same as in Fig. S1; The scenario of BLS is the same as in Fig. S5; The scenarios of High, Medium, and Low are the same as in Fig. S3.

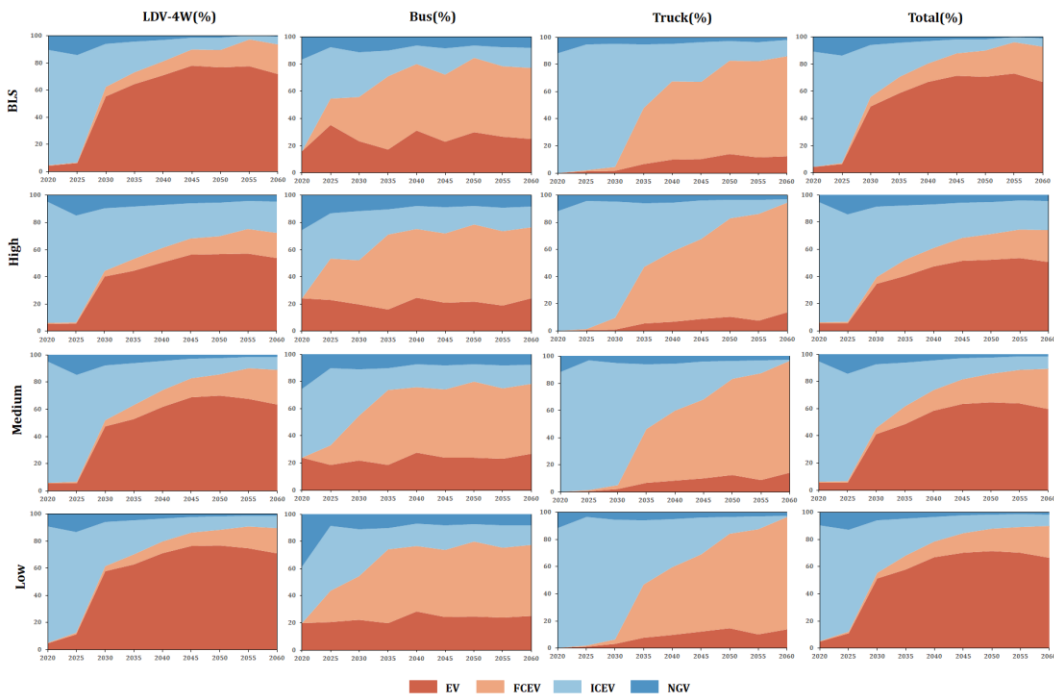

369  
 370  
 371  
 372  
 373

**Figure S23. Vehicle penetration rate from 2020 to 2060 in which EVs are equipped with NCM622 LIBs.** The abbreviations of EV, FCEV, ICEV, HEV, NGV, and LDV-4W are the same as in Fig. S1; The scenario of BLS is the same as in Fig. S5; The scenarios of High, Medium, and Low are the same as in Fig. S3.

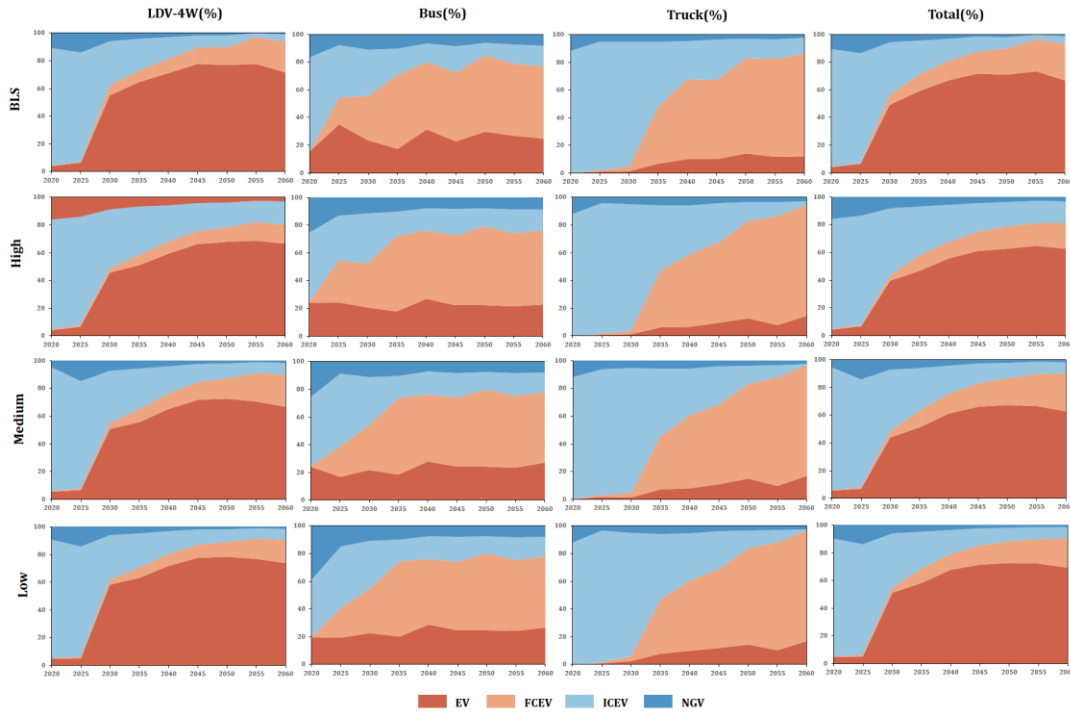

374

375 **Figure S24.** Vehicle penetration rate from 2020 to 2060 in which EVs are equipped with  
 376 NCM811 LIBs. The abbreviations of EV, FCEV, ICEV, HEV, NGV, and LDV-4W are the same as in Fig.  
 377 S1; The scenario of BLS is the same as in Fig. S5; The scenarios of High, Medium, and Low are the  
 378 same as in Fig. S3.

379

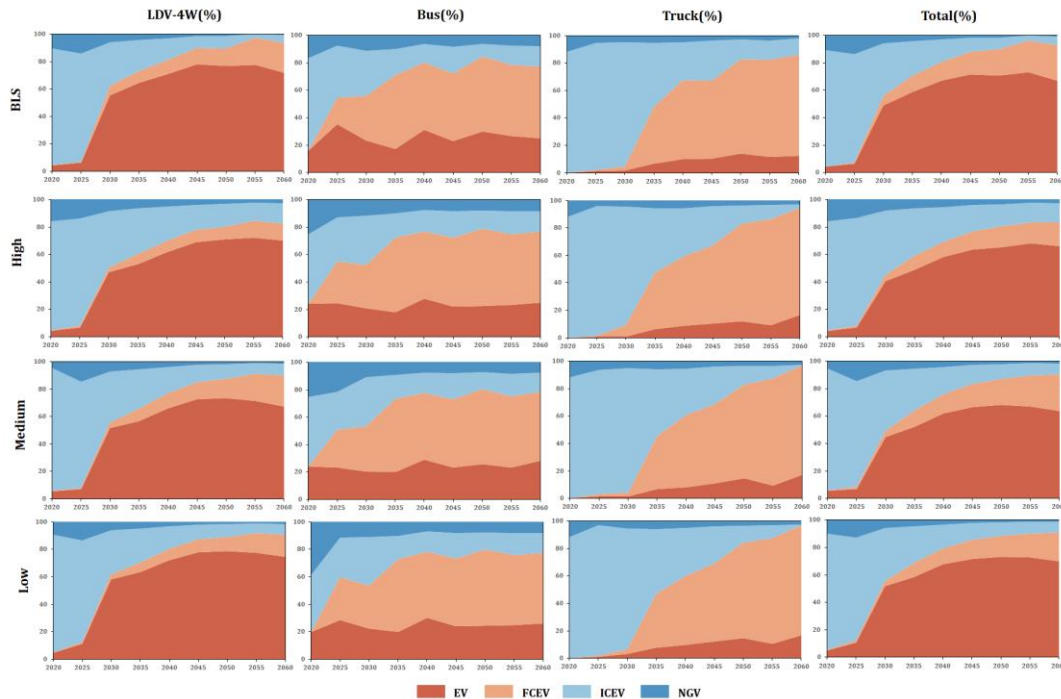

380

381 **Figure S25.** Vehicle penetration rate from 2020 to 2060 in which EVs are equipped with  
 382 NCM9.5 LIBs. The abbreviations of EV, FCEV, ICEV, HEV, NGV, and LDV-4W are the same as in Fig.  
 383 S1; The scenario of BLS is the same as in Fig. S5; The scenarios of High, Medium, and Low are the  
 384 same as in Fig. S3.

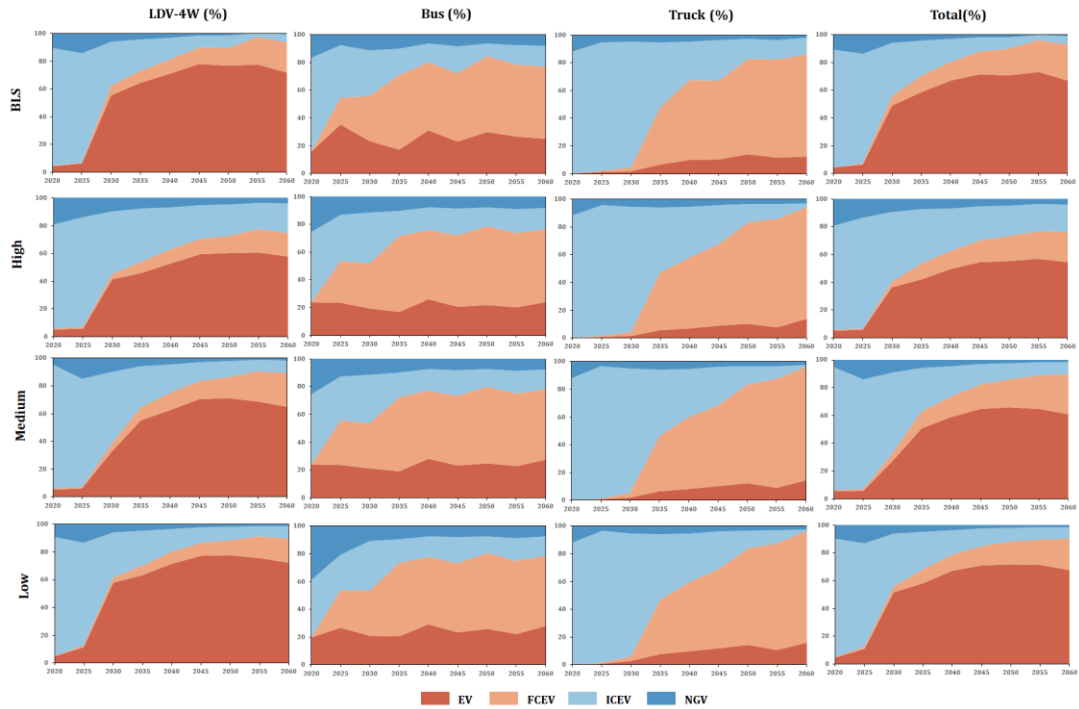

385

386 **Figure S26. Vehicle penetration rate from 2020 to 2060 in which EVs are equipped with NCA**  
 387 **LIBs.** The abbreviations of EV, FCEV, ICEV, HEV, NGV, and LDV-4W are the same as in Fig. S1; The  
 388 scenario of BLS is the same as in Fig. S5; The scenarios of High, Medium, and Low are the same as  
 389 in Fig. S3.

390

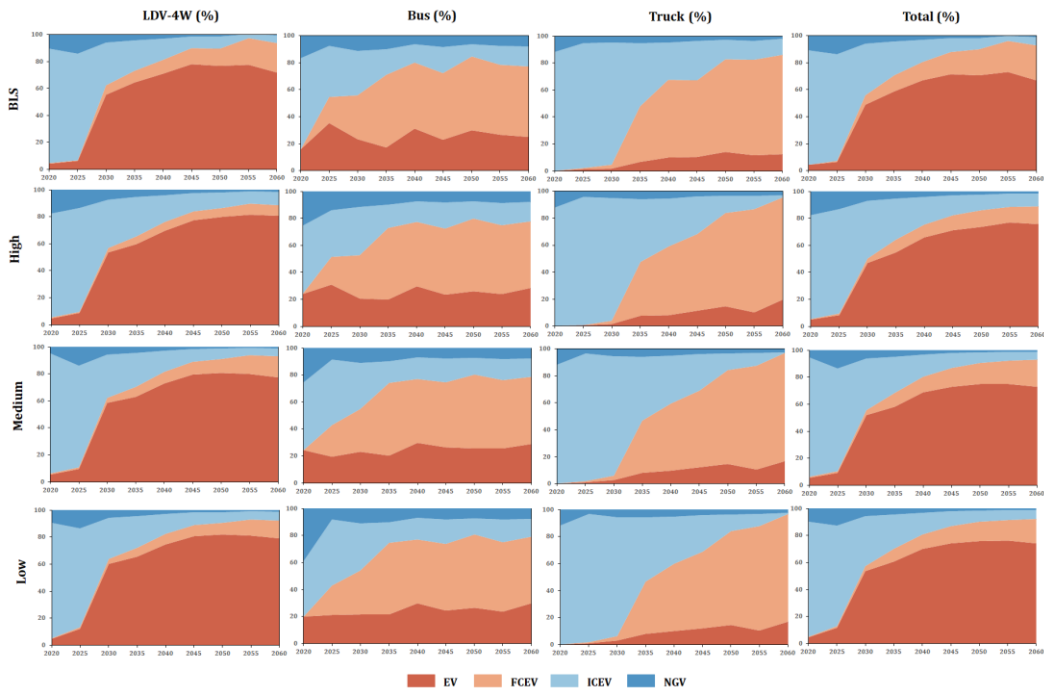

391

392 **Figure S27. Vehicle penetration rate from 2020 to 2060 in which EVs are equipped with**  
 393 **LFP LIBs.** The abbreviations of EV, FCEV, ICEV, HEV, NGV, and LDV-4W are the same as in Fig. S1;  
 394 The scenario of BLS is the same as in Fig. S5; The scenarios of High, Medium, and Low are the  
 395 same as in Fig. S3.

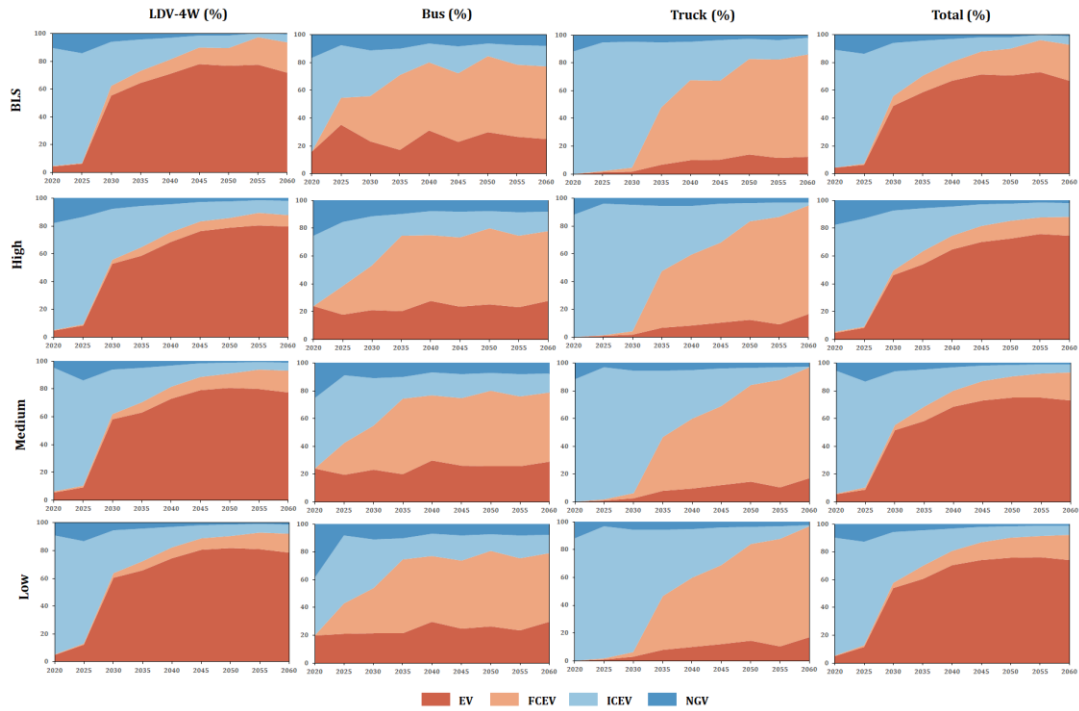

396  
 397  
 398  
 399  
 400  
 401

**Figure S28. Vehicle penetration rate from 2020 to 2060 in which EVs are equipped with LMO LIBs.** The abbreviations of EV, FCEV, ICEV, HEV, NGV, and LDV-4W are the same as in Fig. S1; The scenario of BLS is the same as in Fig. S5; The scenarios of High, Medium, and Low are the same as in Fig. S3.

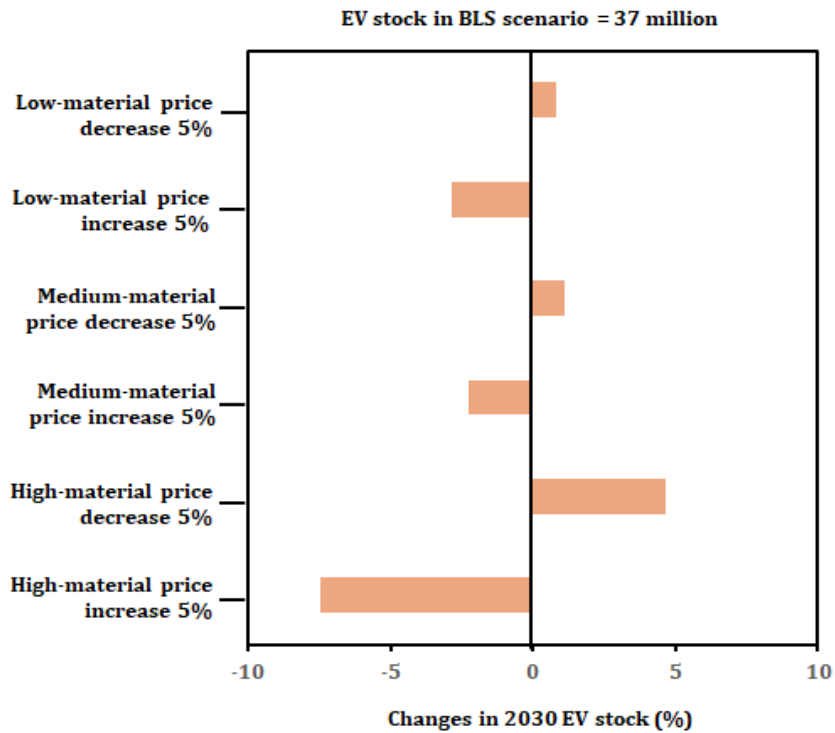

402  
 403  
 404  
 405

**Figure S29. Sensitivity analysis for EV deployment in China in 2030.** The abbreviation of EV is the same as in Fig. S1; EVs are equipped with NCM622 LIBs; The scenario of BLS is the same as in Fig. S5; The scenarios of High, Medium, and Low are the same as in Fig. S3.

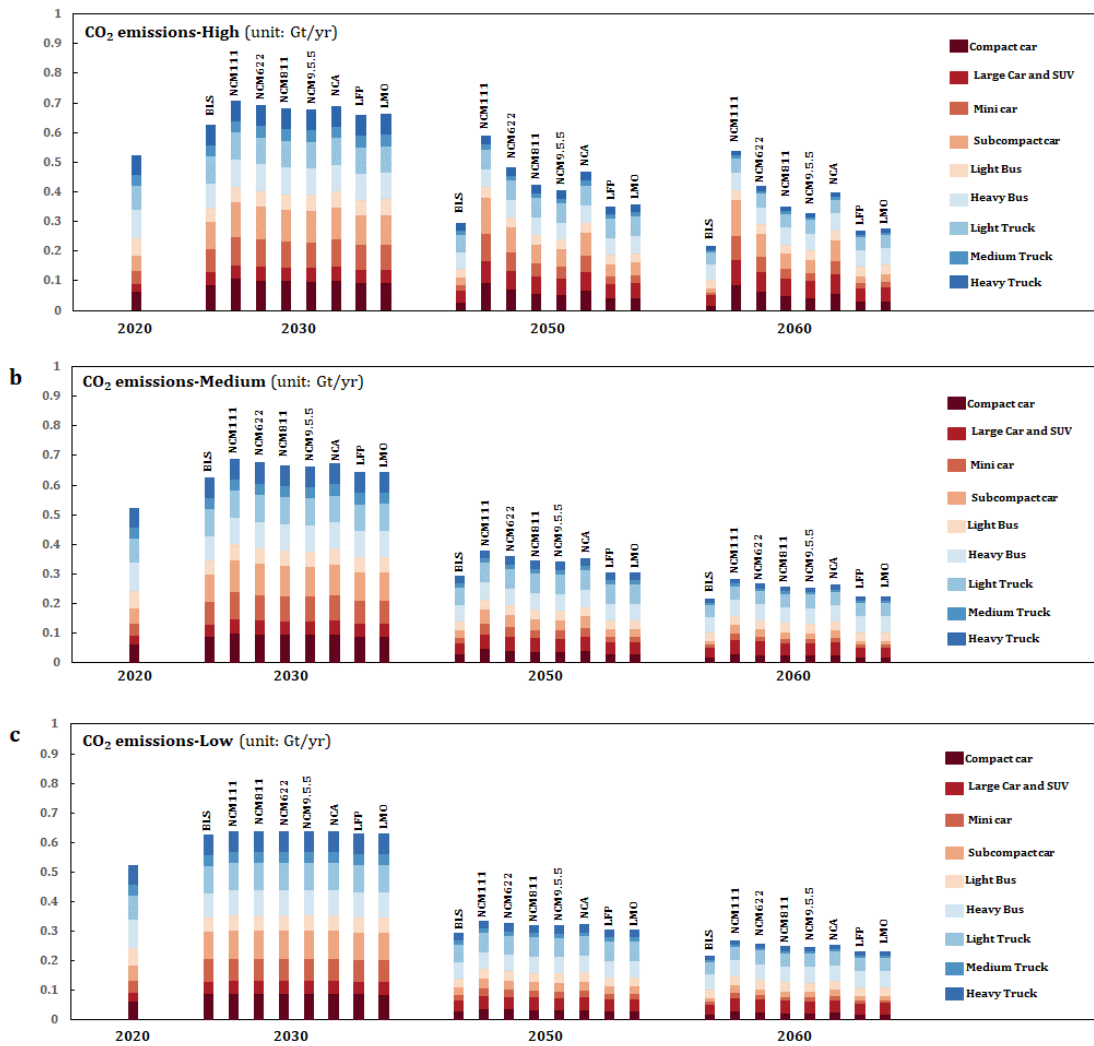

407  
 408  
 409  
 410  
 411

**Figure S30. CO<sub>2</sub> emissions by sector in road transportation from 2020 to 2060.** The scenario of BLS is the same as in Fig. S5; The scenarios of High, Medium, and Low are the same as in Fig. S3.

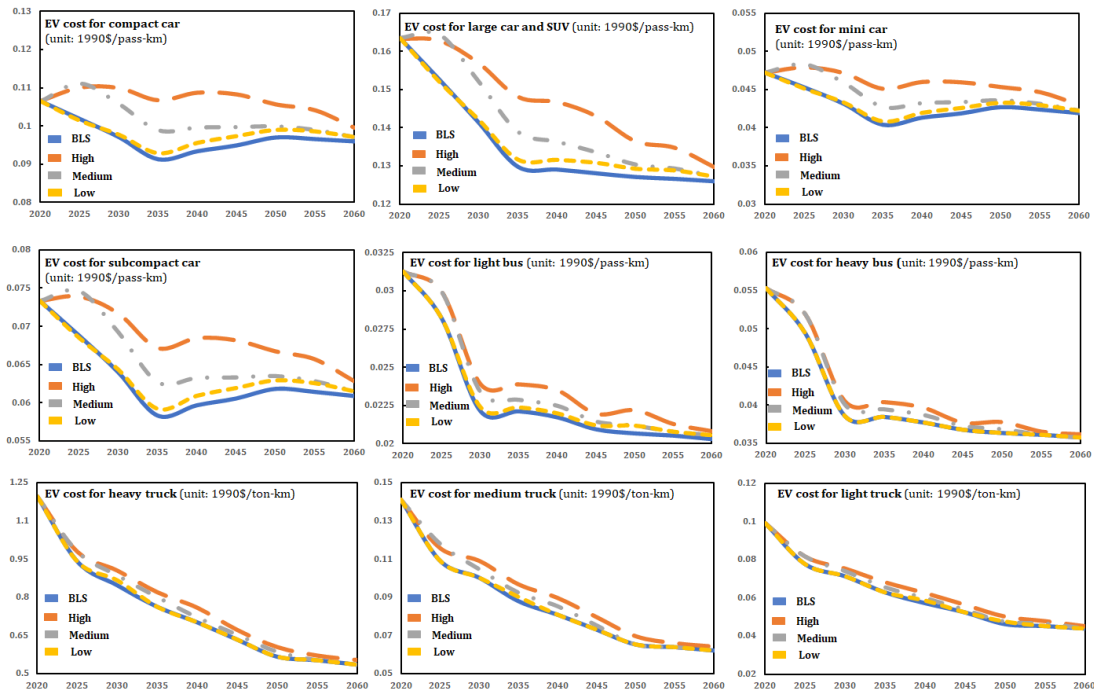

412  
413  
414  
415  
416

**Figure S31. Cost evolution of EV equipped with NCM111 LIBs from 2020 to 2060 in recycling scenario.** The scenario of BLS is the same as in Fig. S5; The scenarios of High, Medium, and Low are the same as in Fig. S3; The abbreviation of EV is the same as in Fig. S1.

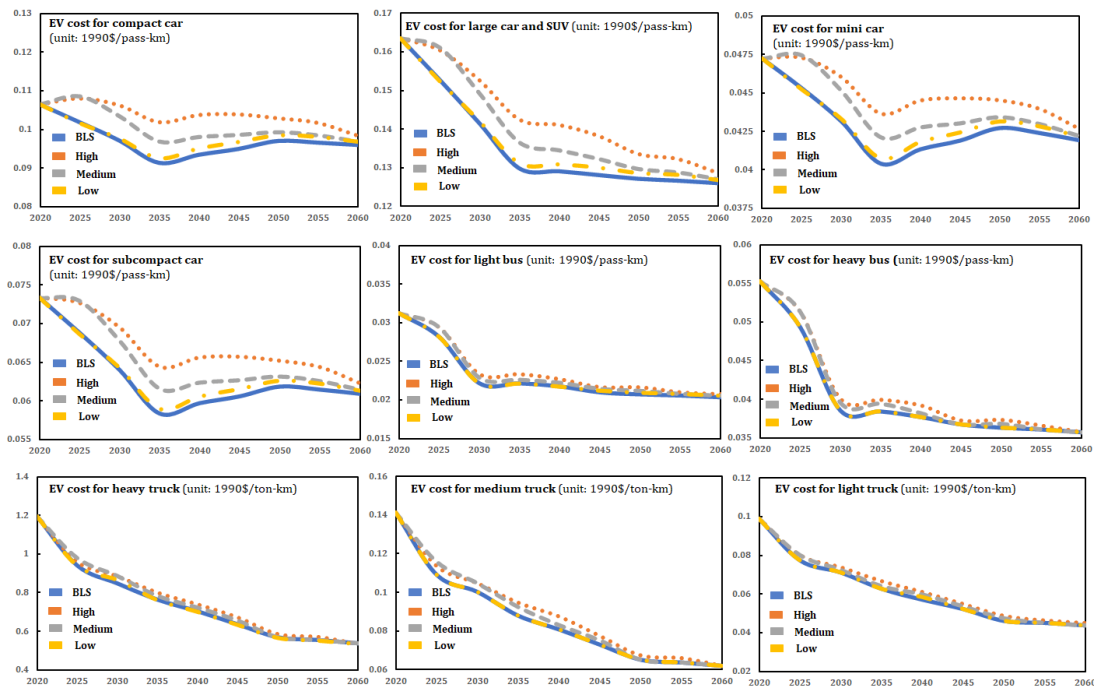

417  
418  
419  
420  
421  
422

**Figure S32. Cost evolution of EV equipped with NCM622 LIBs from 2020 to 2060 in recycling scenario.** The scenario of BLS is the same as in Fig. S5; The scenarios of High, Medium, and Low are the same as in Fig. S3; The abbreviation of EV is the same as in Fig. S1.

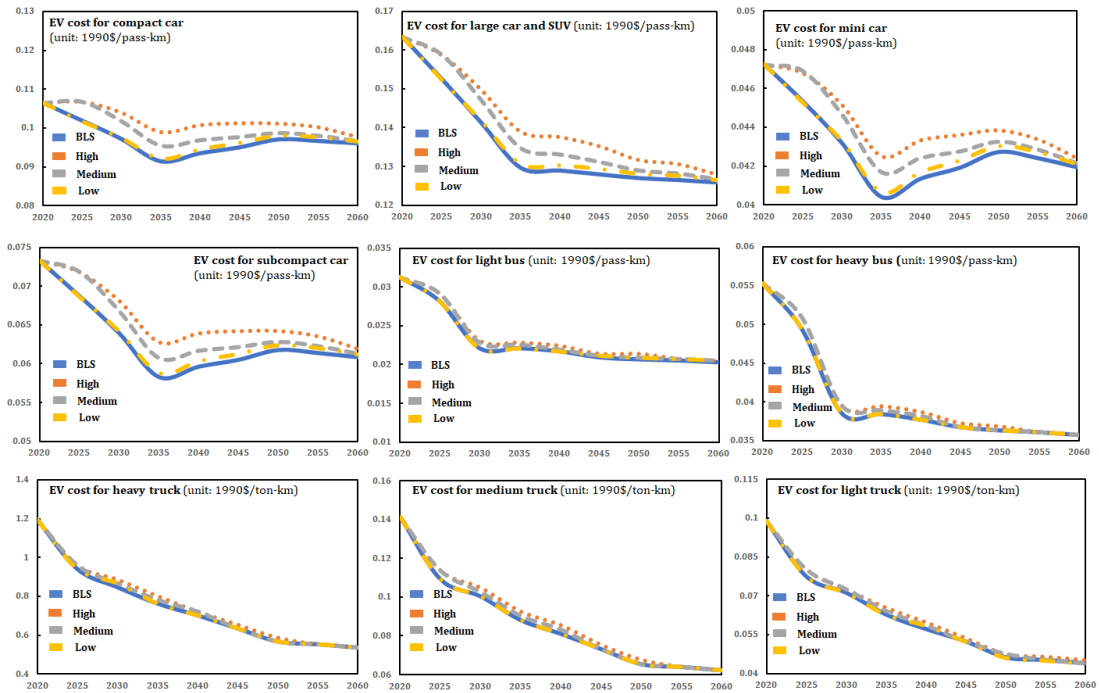

423  
 424 **Figure S33. Cost evolution of EV equipped with NCM811 LIBs from 2020 to 2060 in recycling**  
 425 **scenario.** The scenario of BLS is the same as in Fig. S5; The scenarios of High, Medium, and Low  
 426 are the same as in Fig. S3; The abbreviation of EV is the same as in Fig. S1.  
 427

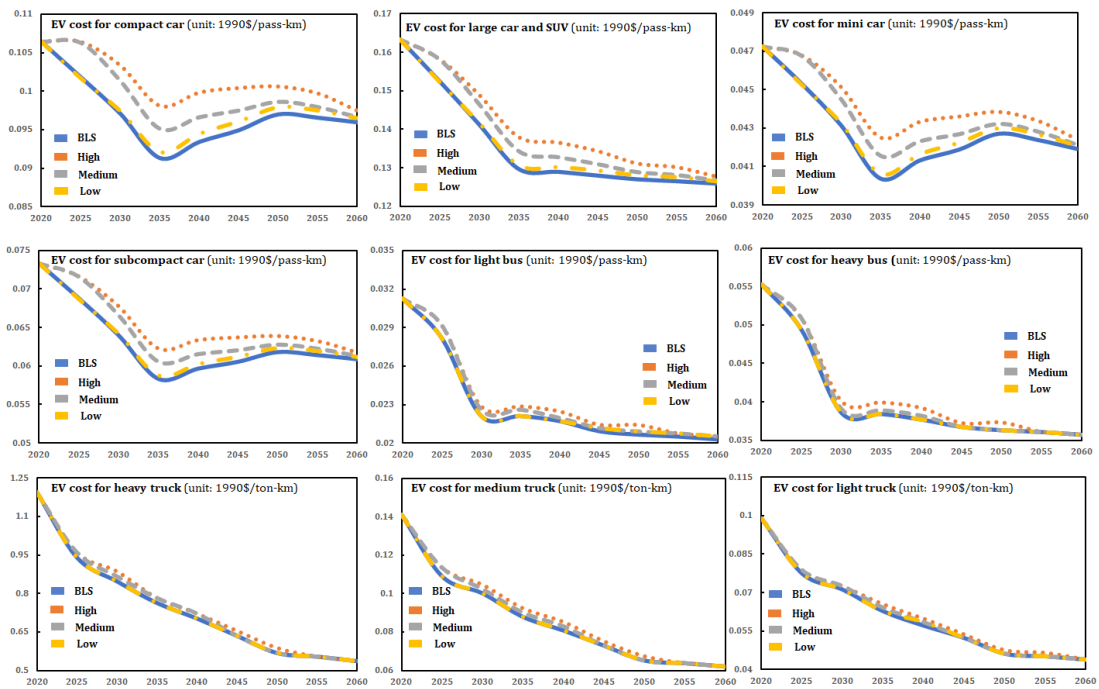

428  
 429 **Figure S34. Cost evolution of EV equipped with NCM9.5.5 LIBs from 2020 to 2060 in**  
 430 **recycling scenario.** The scenario of BLS is the same as in Fig. S5; The scenarios of High, Medium,  
 431 and Low are the same as in Fig. S3; The abbreviation of EV is the same as in Fig. S1.  
 432  
 433



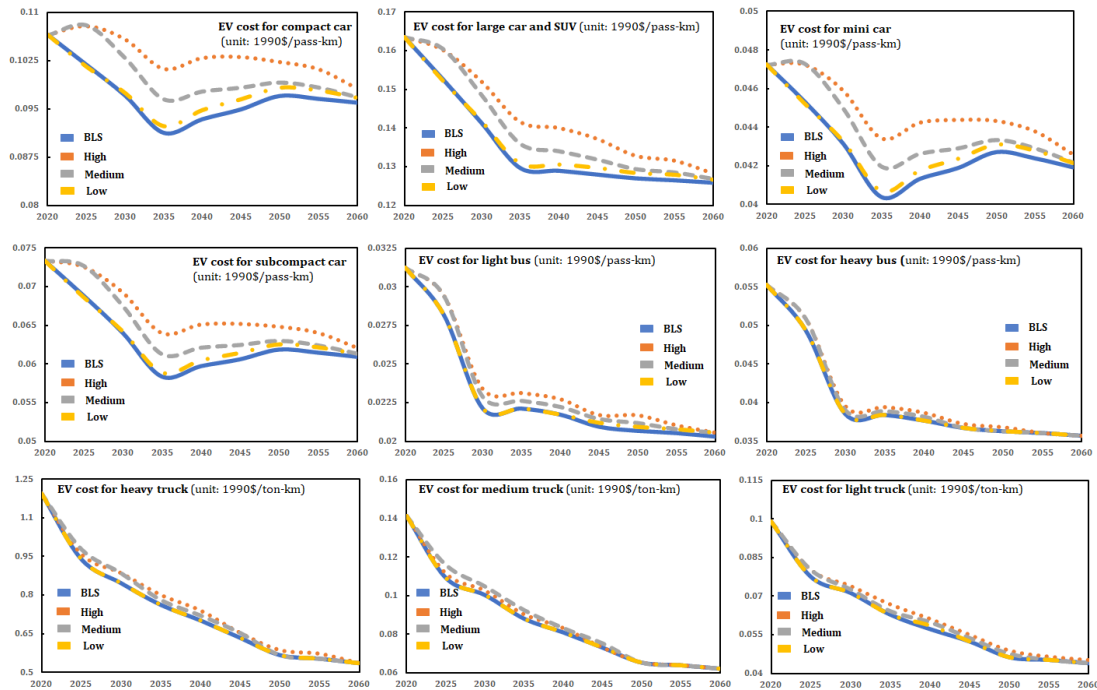

434  
435  
436  
437  
438

**Figure S35. Cost evolution of EV equipped with NCA LIBs from 2020 to 2060 in recycling scenario.** The scenario of BLS is the same as in Fig. S5; The scenarios of High, Medium, and Low are the same as in Fig. S3; The abbreviation of EV is the same as in Fig. S1.

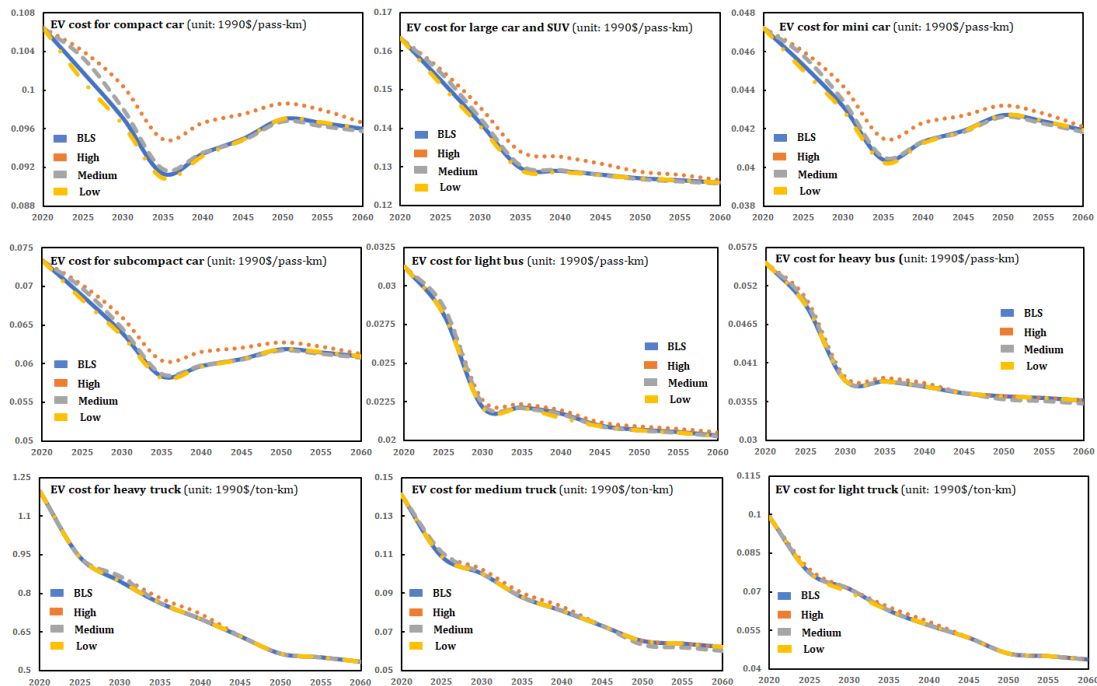

439  
440  
441  
442  
443  
444

**Figure S36. Cost evolution of EV equipped with LFP LIBs from 2020 to 2060 in recycling scenario.** The scenario of BLS is the same as in Fig. S5; The scenarios of High, Medium, and Low are the same as in Fig. S3; The abbreviation of EV is the same as in Fig. S1.

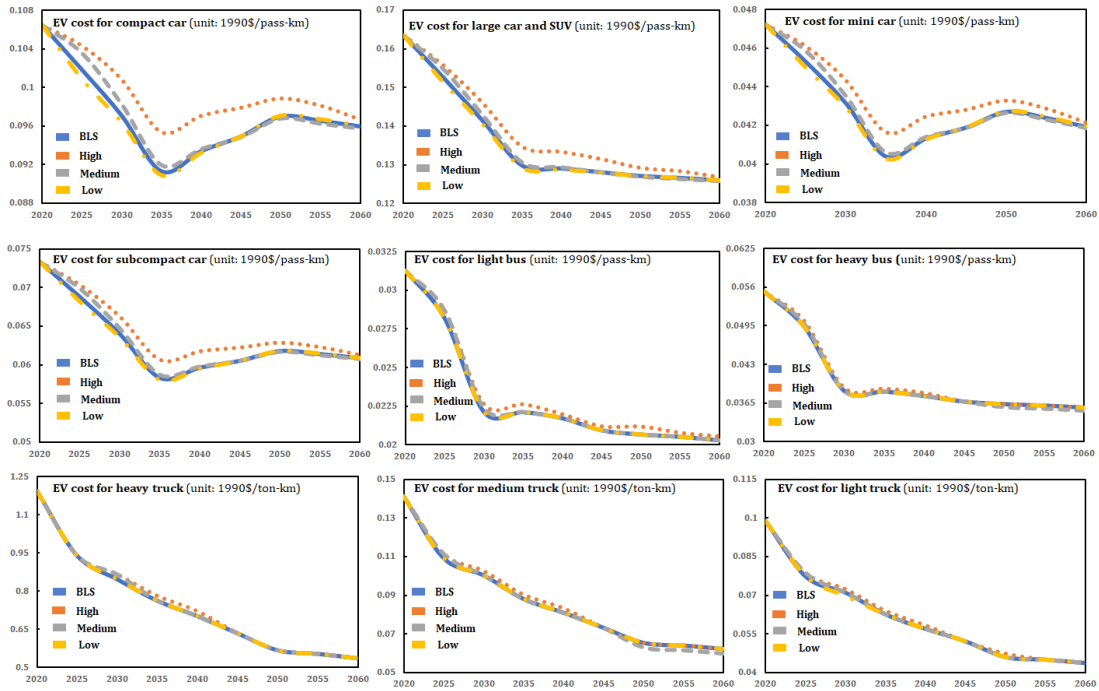

445

446 **Figure S37. Cost evolution of EV equipped with LMO LIBs from 2020 to 2060 in recycling**  
 447 **scenario.** The scenario of BLS is the same as in Fig. S5; The scenarios of High, Medium, and Low  
 448 are the same as in Fig. S3; The abbreviation of EV is the same as in Fig. S1.

449

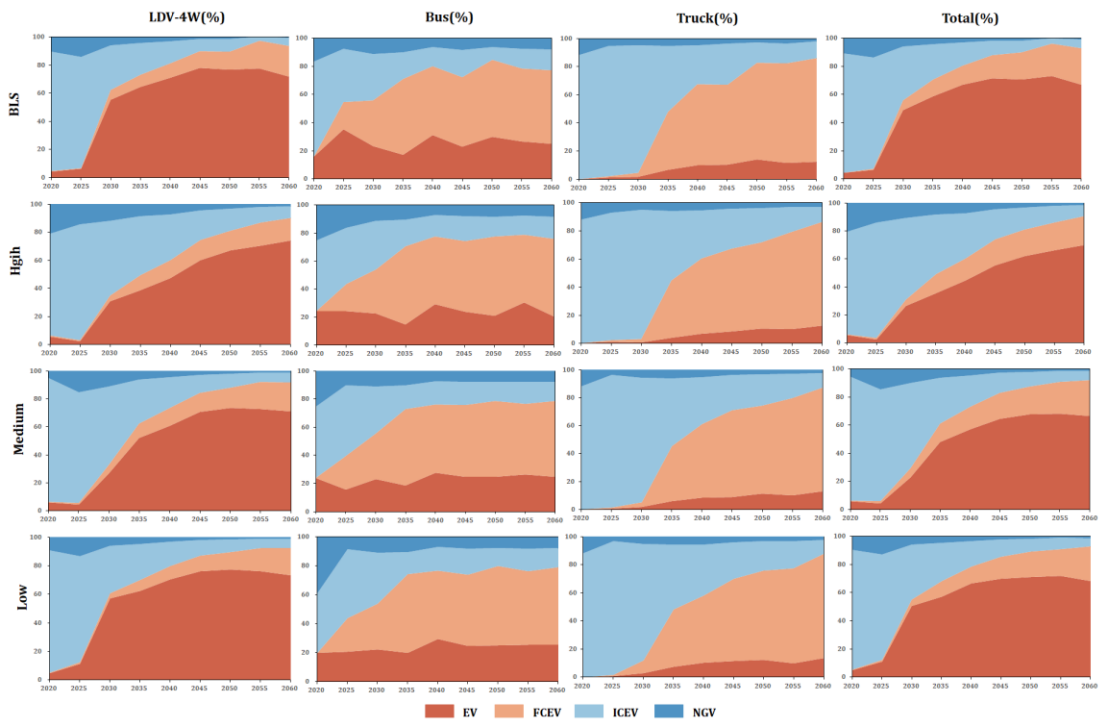

450

451 **Figure S38. Vehicle penetration rate from 2020 to 2060 in recycling scenario in which EVs**  
 452 **are equipped with NCM111 LIBs.** The abbreviations of EV, FCEV, ICEV, HEV, NGV and LDV-4W are  
 453 the same as in Fig. S1; The scenario of BLS is the same as in Fig. S5; The scenarios of High, Medium,  
 454 and Low are the same as in Fig. S3.

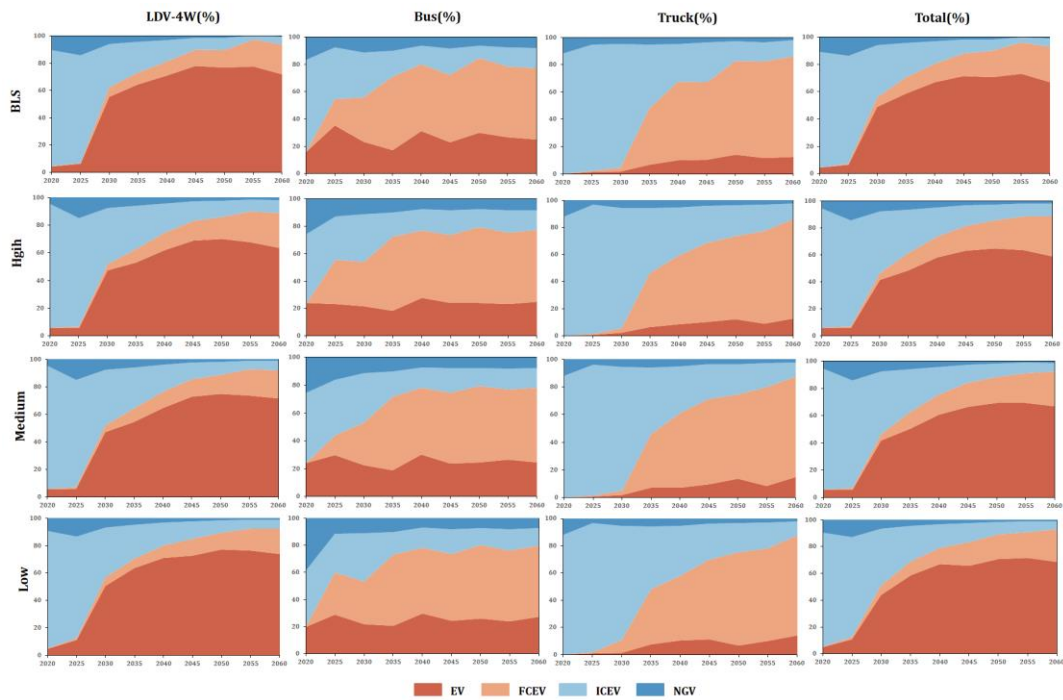

455  
 456 **Figure S39. Vehicle penetration rate from 2020 to 2060 in recycling scenario in which EVs**  
 457 **are equipped with NCM622 LIBs.** The abbreviations of EV, FCEV, ICEV, HEV, NGV and LDV-4W are  
 458 the same as in Fig. S1; The scenario of BLS is the same as in Fig. S5; The scenarios of High, Medium,  
 459 and Low are the same as in Fig. S3.  
 460

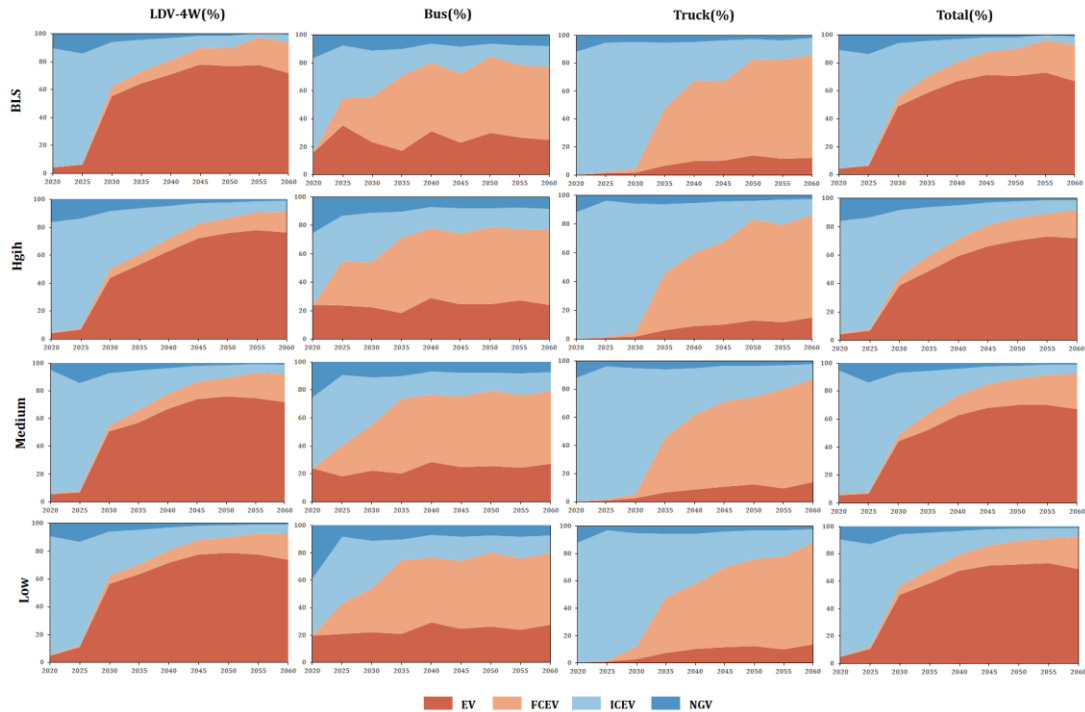

461  
 462 **Figure S40. Vehicle penetration rate from 2020 to 2060 in recycling scenario in which EVs**  
 463 **are equipped with NCM811 LIBs.** The abbreviations of EV, FCEV, ICEV, HEV, NGV and LDV-4W are  
 464 the same as in Fig. S1; The scenario of BLS is the same as in Fig. S5; The scenarios of High, Medium,  
 465 and Low are the same as in Fig. S3.

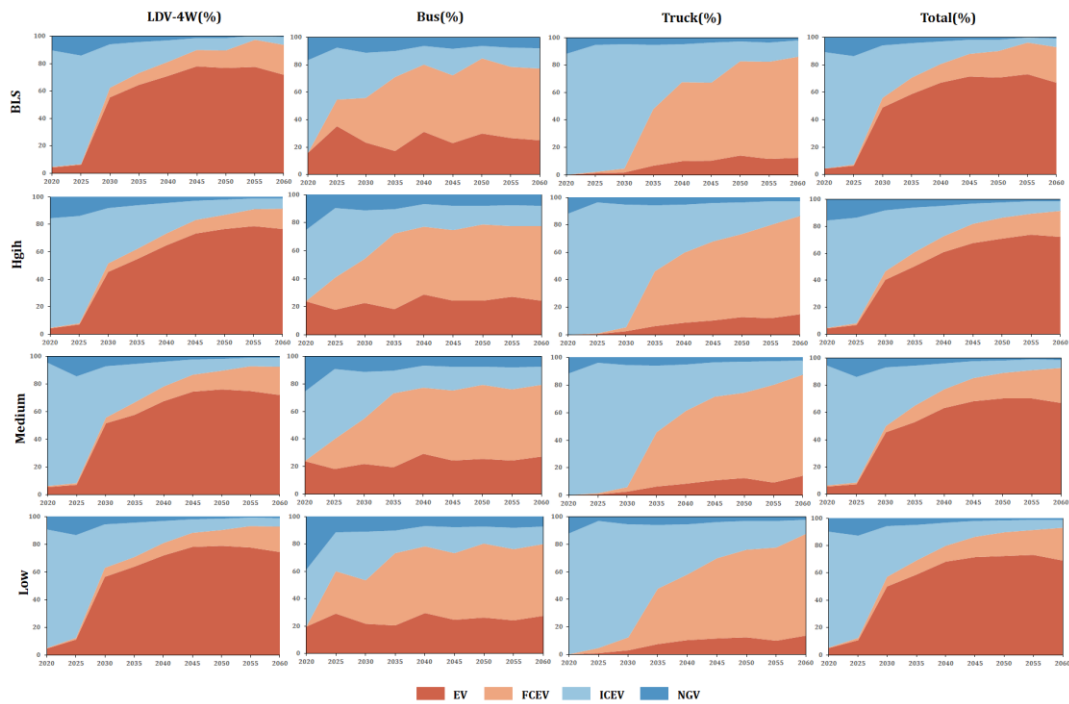

466  
 467 **Figure S41. Vehicle penetration rate from 2020 to 2060 in recycling scenario in which EVs**  
 468 **are equipped with NCM9.5.5 LIBs.** The abbreviations of EV, FCEV, ICEV, HEV, NGV and LDV-4W  
 469 are the same as in Fig. S1; The scenario of BLS is the same as in Fig. S5; The scenarios of High,  
 470 Medium, and Low are the same as in Fig. S3.  
 471

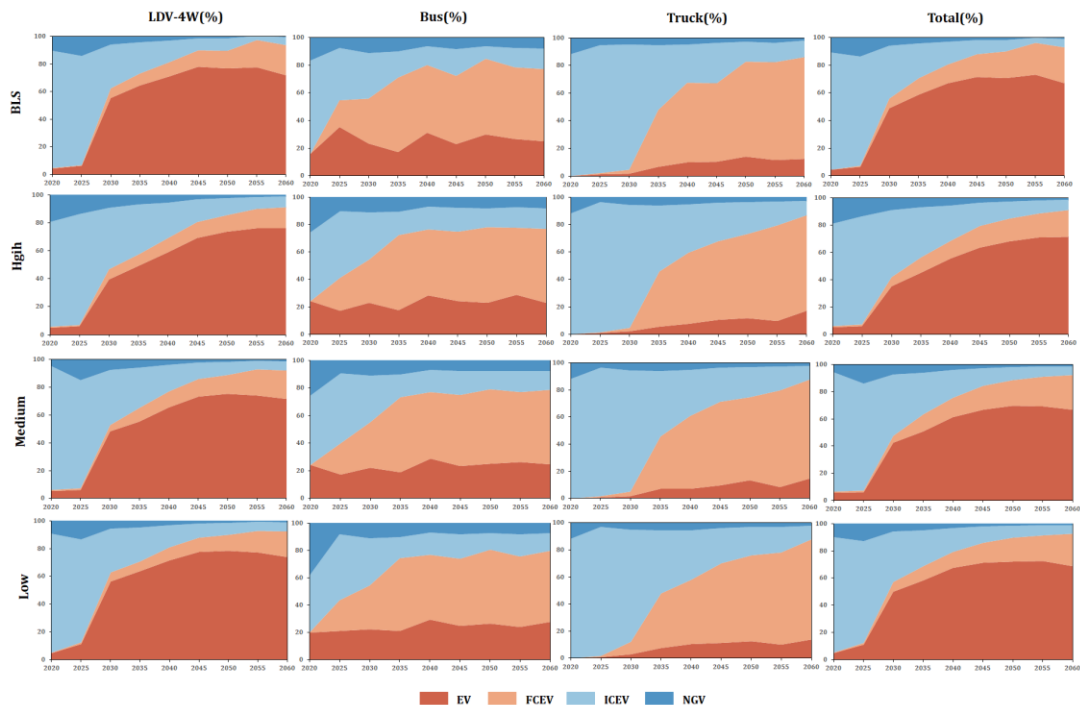

472  
 473 **Figure S42. Vehicle penetration rate from 2020 to 2060 in recycling scenario in which EVs**  
 474 **are equipped with NCA LIBs.** The abbreviations of EV, FCEV, ICEV, HEV, NGV and LDV-4W are the  
 475 same as in Fig. S1; The scenario of BLS is the same as in Fig. S5; The scenarios of High, Medium,  
 476 and Low are the same as in Fig. S3.

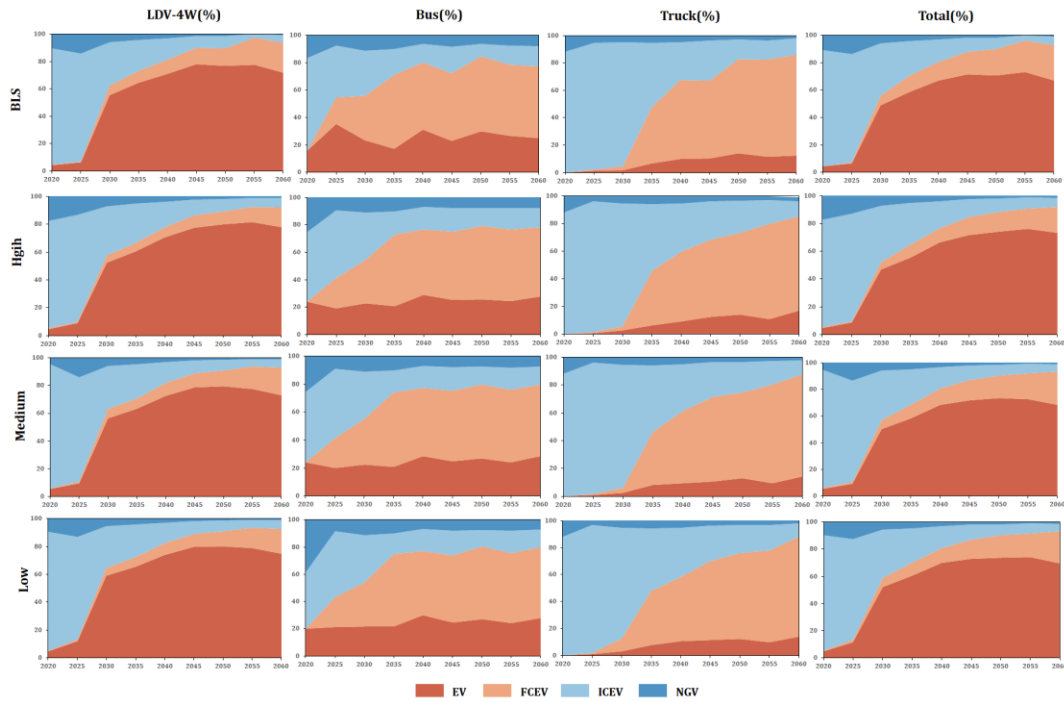

477  
 478 **Figure S43. Vehicle penetration rate from 2020 to 2060 in recycling scenario in which EVs**  
 479 **are equipped with LFP LIBs.** The abbreviations of EV, FCEV, ICEV, HEV, NGV and LDV-4W are the  
 480 same as in Fig. S1; The scenario of BLS is the same as in Fig. S5; The scenarios of High, Medium, and  
 481 Low are the same as in Fig. S3.  
 482

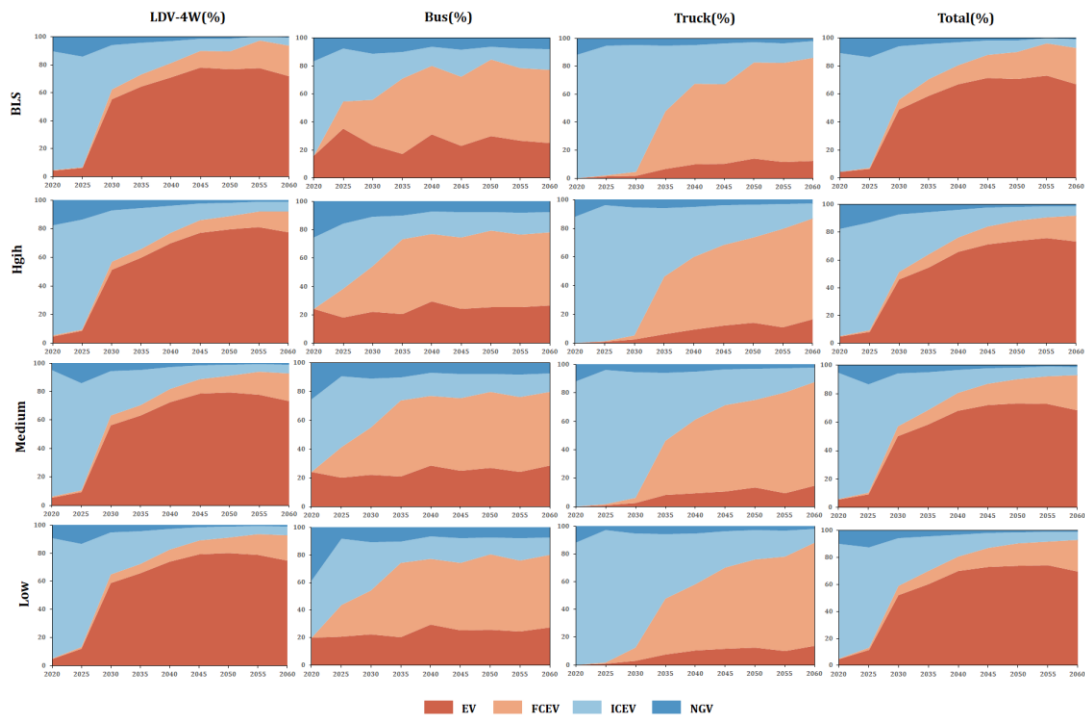

483  
 484 **Figure S44. Vehicle penetration rate from 2020 to 2060 in recycling scenario in which EVs**  
 485 **are equipped with LMO LIBs.** The abbreviations of EV, FCEV, ICEV, HEV, NGV and LDV-4W are the  
 486 same as in Fig. S1; The scenario of BLS is the same as in Fig. S5; The scenarios of High, Medium, and  
 487 Low are the same as in Fig. S3.

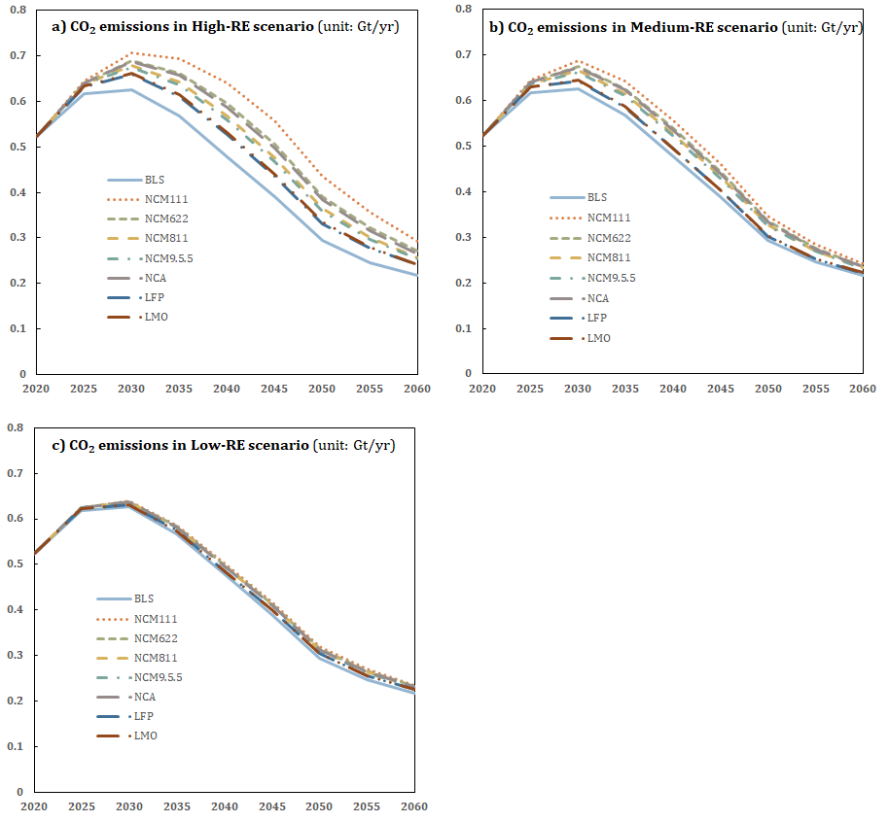

488  
 489  
 490  
 491  
 492  
 493  
 494

**Figure S45. CO<sub>2</sub> emissions by year in recycling scenarios in road transportation from 2020 to 2060.** The abbreviations of EV, FCEV, ICEV, HEV, and NGV are the same as in Fig. S1; The scenario of BLS is the same as in Fig. S5; The scenarios of High, Medium, and Low RE is a scenario in which only primary demand is affected by the market price of the material concerned.

495 **References**

- 496 1. Kim, S. H., Edmonds, J., Lurz, J., Smith, S. J. & Wise, M. The ObjECTS framework for integrated  
497 assessment: hybrid modeling of transportation. *Energy J.* (2006).
- 498 2. Kyle, P. & Kim, S. H. Long-term implications of alternative light-duty vehicle technologies for  
499 global greenhouse gas emissions and primary energy demands. *Energy Policy* **39**, 3012-3024  
500 (2011).
- 501 3. Sun, Y., Delucchi, M. & Ogden, J. The impact of widespread deployment of fuel cell vehicles on  
502 platinum demand and price. *Int. J. Hydrogen Energy* **36**, 11116-11127 (2011).
- 503 4. MineDesign. Metal price forecasting.  
504 [http://minewiki.engineering.queensu.ca/mediawiki/index.php/Metal\\_price\\_forecasting](http://minewiki.engineering.queensu.ca/mediawiki/index.php/Metal_price_forecasting)  
505 (2014).
- 506 5. Historical Monthly Consumer Price Index All Urban Consumers (CPI-U). *Bureau of Labor*  
507 *Statistics, Washington*, 2013).
- 508 6. Metalary. *Iron price*. <https://www.metalary.com/iron-price/> (2019).
- 509 7. Infomine. *1 year aluminum prices and price charts*. [http://](http://www.infomine.com/investment/metal-prices/aluminum/1-year/)  
510 [www.infomine.com/investment/metal-prices/aluminum/1-year/](http://www.infomine.com/investment/metal-prices/aluminum/1-year/) (2019).
- 511 8. Fickling, D. This cobalt chemistry experiment is rich with variables.  
512 <https://www.bloomberg.com/gadfly/articles/2017-09-28/cobalt-s-chemistry-experiment>  
513 (2017).
- 514 9. Leader, A., Gaustad, G. & Babbitt, C. The effect of critical material prices on the competitiveness  
515 of clean energy technologies. *Mater. Renewable Sustainable Energy* **8**, 1-17 (2019).
- 516 10. Wang, P., Chen, L.-Y., Ge, J.-P., Cai, W. & Chen, W.-Q. Incorporating critical material cycles into  
517 metal-energy nexus of China's 2050 renewable transition. *Appl. Energy* **253**, 113612 (2019).
- 518 11. Hao, H. *et al.* Impact of transport electrification on critical metal sustainability with a focus on  
519 the heavy-duty segment. *Nat. Commun.* **10**, 1-7 (2019).
- 520 12. Abdelbaky, M., Peeters, J. R. & Dewulf, W. On the influence of second use, future battery  
521 technologies, and battery lifetime on the maximum recycled content of future electric vehicle  
522 batteries in Europe. *Waste Manage.* **125**, 1-9 (2021).
- 523 13. Patry, G., Romagny, A., Martinet, S. & Froelich, D. Cost modeling of lithium-ion battery cells for  
524 automotive applications. *Energy Sci. Eng.* **3**, 71-82 (2015).
- 525 14. CleanTeq. *Nickel & cobalt for lithium ion batteries*. [http://www.cleanteq.com/wp-](http://www.cleanteq.com/wp-content/uploads/2017/12/171205_Clean-Teq-LITHIUM-ION-BATTERIES.pdf)  
526 [content/uploads/2017/12/171205\\_Clean-Teq-LITHIUM-ION-BATTERIES.pdf](http://www.cleanteq.com/wp-content/uploads/2017/12/171205_Clean-Teq-LITHIUM-ION-BATTERIES.pdf) (2017).
- 527 15. Chung, D., James, T., Elgqvist, E., Goodrich, A. & Santhanagopalan, S. *Automotive Lithium-ion*  
528 *Battery (LIB) Supply Chain and US Competitiveness Considerations*. (National Renewable  
529 Energy Lab.(NREL), Golden, CO (United States), 2015).
- 530 16. Olivetti, E. A., Ceder, G., Gaustad, G. G. & Fu, X. Lithium-ion battery supply chain considerations:  
531 analysis of potential bottlenecks in critical metals. *Joule* **1**, 229-243 (2017).
- 532 17. USGS. Lithium. <https://www.usgs.gov/centers/nmic/lithium-statistics-and-information>  
533 (2019).
- 534 18. InvestmentMine. *Commodity and Metal Prices, Metal Price Charts*.  
535 <http://www.infomine.com/investment/metal-prices/> (2019).
- 536 19. Metalary. *Manganese price*. <https://www.metalary.com/manganese-price/> (2019).
- 537 20. Satyapal, S. Us department of energy hydrogen and fuel cell overview. *US Dep. Energy EERE*  
538 (2016).

- 539 21. Arnold, R. *The Lowdown on Hydrogen—Part 1: Transportation*. (Energypost, 2017).
- 540 22. IOP Institute of Physics. *Fuel cells*.  
541 <http://www.iop.org/resources/topic/archive/fuel/index.html> (2019).
- 542 23. Marcinkoski, J., Spendelow, J. *DOE fuel cell technologies program record*. (U.S. Department of  
543 Energy, 2019).
- 544 24. Bustamante, M. L. & Gaustad, G. Challenges in assessment of clean energy supply-chains based  
545 on byproduct minerals: A case study of tellurium use in thin film photovoltaics. *Appl. Energy*  
546 **123**, 397-414 (2014).
- 547 25. Chemistry Views. *Fuel cell capacity and cost trends*.  
548 [https://www.chemistryviews.org/details/ezine/4817371/Fuel\\_Cell\\_Capacity\\_and\\_Cost\\_Trends/](https://www.chemistryviews.org/details/ezine/4817371/Fuel_Cell_Capacity_and_Cost_Trends/)  
549 (2013).
- 550 26. Piccirilli, D. *Fact sheet—fuel cells*. <https://www.eesi.org/papers/view/fact-sheet-fuel-cells>  
551 (2015).
- 552 27. Ou, S. *et al.* Intensity and daily pattern of passenger vehicle use by region and class in China:  
553 estimation and implications for energy use and electrification. *Mitig. Adapt. Strateg. Glob.*  
554 *Chang.* **25**, 307-327 (2020).
- 555 28. Zheng, B. *et al.* How will greenhouse gas emissions from motor vehicles be constrained in  
556 China around 2030? *Appl. Energy* **156**, 230-240 (2015).
- 557 29. Bloomberg New Energy Finance. *Lithium price spike has moderate effect on batteries*.  
558 <https://about.bnef.com/blog/lithium-price-spike-has-moderate-effect-on-batteries/> (2017).
- 559 30. Liu, B. *et al.* The impacts of critical metal shortage on China's electric vehicle industry  
560 development and countermeasure policies. *Energy* **248**, 123646 (2022).
- 561 31. Milovanoff, A., Posen, I. D. & MacLean, H. L. Electrification of light-duty vehicle fleet alone will  
562 not meet mitigation targets. *Nat. Clim. Change* **10**, 1102-1107 (2020).
- 563 32. McCollum, D. L. *et al.* Interaction of consumer preferences and climate policies in the global  
564 transition to low-carbon vehicles. *Nat. Energy* **3**, 664-673 (2018).
- 565 33. Isik, M., Dodder, R. & Kaplan, P. O. Transportation emissions scenarios for New York City under  
566 different carbon intensities of electricity and electric vehicle adoption rates. *Nat. Energy* **6**, 92-  
567 104 (2021).
- 568 34. Baars, J., Domenech, T., Bleischwitz, R., Melin, H. E. & Heidrich, O. Circular economy strategies  
569 for electric vehicle batteries reduce reliance on raw materials. *Nat. Sustainability* **4**, 71-79  
570 (2021).
- 571 35. Peng, T., Ou, X., Yuan, Z., Yan, X. & Zhang, X. Development and application of China provincial  
572 road transport energy demand and GHG emissions analysis model. *Appl. Energy* **222**, 313-328  
573 (2018).
- 574 36. Pan, X., Wang, H., Wang, L. & Chen, W. Decarbonization of China's transportation sector: in light  
575 of national mitigation toward the Paris Agreement goals. *Energy* **155**, 853-864 (2018).
- 576 37. Khanna, N., Lu, H., Fridley, D. & Zhou, N. Near and long-term perspectives on strategies to  
577 decarbonize China's heavy-duty trucks through 2050. *Sci Rep* **11**, 1-14 (2021).
- 578
